# Supplementary material for: Attenuated Negative Feedback in Monocyte-Derived Macrophages From Persons Living With HIV: A Role for IKAROS
Source: Front Immunol. 2021 Nov 30;12:785905. doi: 10.3389/fimmu.2021.785905 (PMC8668949; doi:10.3389/fimmu.2021.785905)
Supplement: Supplementary file 1 [file DataSheet_1.xlsx]

## Sheet: H3K4me1_Introns
HIV
seqnames	start	end	width	strand	ID	qvalue	annot.seqnames	annot.start	annot.end	annot.width	annot.strand	annot.id	annot.tx_id	annot.gene_id	annot.symbol	annot.type
chr1	22241600	22242199	600	*	585sicer	4.11628e-10	chr1	22222804	22263647	40844	-	intron:38592	uc001bfj.3	3339	HSPG2	hg19_genes_introns
chr1	22241600	22242199	600	*	585sicer	4.11628e-10	chr1	22222804	22263647	40844	-	intron:38688	uc009vqd.3	3339	HSPG2	hg19_genes_introns
chr1	66777800	66779599	1800	*	1801sicer	1.03152e-07	chr1	66731771	66798190	66420	+	intron:12700	uc001dcn.3	5142	PDE4B	hg19_genes_introns
chr1	66777800	66779599	1800	*	1801sicer	1.03152e-07	chr1	66731771	66798190	66420	+	intron:12715	uc009war.3	5142	PDE4B	hg19_genes_introns
chr1	66777800	66779599	1800	*	1801sicer	1.03152e-07	chr1	66731771	66798190	66420	+	intron:12731	uc001dco.3	5142	PDE4B	hg19_genes_introns
chr1	66777800	66779599	1800	*	1801sicer	1.03152e-07	chr1	66731771	66798190	66420	+	intron:12745	uc001dcp.3	5142	PDE4B	hg19_genes_introns
chr1	92163000	92163599	600	*	2104sicer	4.20613e-12	chr1	92161337	92163645	2309	-	intron:47856	uc009wde.3	7049	TGFBR3	hg19_genes_introns
chr1	92163000	92163599	600	*	2104sicer	4.20613e-12	chr1	92161337	92163645	2309	-	intron:47875	uc001doh.3	7049	TGFBR3	hg19_genes_introns
chr1	92163000	92163599	600	*	2104sicer	4.20613e-12	chr1	92161337	92163645	2309	-	intron:47891	uc001doi.3	7049	TGFBR3	hg19_genes_introns
chr1	92163000	92163599	600	*	2104sicer	4.20613e-12	chr1	92161337	92163645	2309	-	intron:47907	uc010osy.2	7049	TGFBR3	hg19_genes_introns
chr1	92163000	92163599	600	*	2104sicer	4.20613e-12	chr1	92161337	92163645	2309	-	intron:47924	uc001doj.3	7049	TGFBR3	hg19_genes_introns
chr1	117087400	117088199	800	*	2554sicer	3.36129e-08	chr1	117087227	117113524	26298	-	intron:50682	uc001egm.3	965	CD58	hg19_genes_introns
chr1	117087400	117088199	800	*	2554sicer	3.36129e-08	chr1	117087227	117113524	26298	-	intron:50687	uc001egn.3	965	CD58	hg19_genes_introns
chr1	117087400	117088199	800	*	2554sicer	3.36129e-08	chr1	117087227	117113524	26298	-	intron:50691	uc010owy.2	965	CD58	hg19_genes_introns
chr1	117087400	117088199	800	*	2554sicer	3.36129e-08	chr1	117087227	117113524	26298	-	intron:50696	uc001egp.4	965	CD58	hg19_genes_introns
chr1	156280800	156281999	1200	*	3042sicer	1.23e-26	chr1	156280987	156281831	845	-	intron:55971	uc001fol.2	7203	CCT3	hg19_genes_introns
chr1	156280800	156281999	1200	*	3042sicer	1.23e-26	chr1	156280987	156281831	845	-	intron:55984	uc001fon.2	7203	CCT3	hg19_genes_introns
chr1	156280800	156281999	1200	*	3042sicer	1.23e-26	chr1	156280987	156281831	845	-	intron:55995	uc010phj.2	7203	CCT3	hg19_genes_introns
chr1	156280800	156281999	1200	*	3042sicer	1.23e-26	chr1	156280987	156281831	845	-	intron:56009	uc010phk.2	7203	CCT3	hg19_genes_introns
chr1	156280800	156281999	1200	*	3042sicer	1.23e-26	chr1	156280987	156281831	845	-	intron:56023	uc010phl.2	7203	CCT3	hg19_genes_introns
chr1	211514600	211515199	600	*	4228sicer	2.91451e-12	chr1	211500016	211526580	26565	+	intron:30157	uc001hih.3	7188	TRAF5	hg19_genes_introns
chr1	211514600	211515199	600	*	4228sicer	2.91451e-12	chr1	211500232	211526580	26349	+	intron:30167	uc001hii.3	7188	TRAF5	hg19_genes_introns
chr1	211514600	211515199	600	*	4228sicer	2.91451e-12	chr1	211500232	211526580	26349	+	intron:30177	uc010psx.2	7188	TRAF5	hg19_genes_introns
chr1	211514600	211515199	600	*	4228sicer	2.91451e-12	chr1	211500232	211526580	26349	+	intron:30187	uc010psy.2	7188	TRAF5	hg19_genes_introns
chr1	211516600	211517999	1400	*	4229sicer	4.69495e-08	chr1	211500016	211526580	26565	+	intron:30157	uc001hih.3	7188	TRAF5	hg19_genes_introns
chr1	211516600	211517999	1400	*	4229sicer	4.69495e-08	chr1	211500232	211526580	26349	+	intron:30167	uc001hii.3	7188	TRAF5	hg19_genes_introns
chr1	211516600	211517999	1400	*	4229sicer	4.69495e-08	chr1	211500232	211526580	26349	+	intron:30177	uc010psx.2	7188	TRAF5	hg19_genes_introns
chr1	211516600	211517999	1400	*	4229sicer	4.69495e-08	chr1	211500232	211526580	26349	+	intron:30187	uc010psy.2	7188	TRAF5	hg19_genes_introns
chr1	231524000	231524599	600	*	4633sicer	8.86e-19	chr1	231509846	231555921	46076	-	intron:63714	uc001huu.3	54583	EGLN1	hg19_genes_introns
chr1	231524000	231524599	600	*	4633sicer	8.86e-19	chr1	231509846	231556743	46898	-	intron:63718	uc001huv.2	54583	EGLN1	hg19_genes_introns
chr2	63351400	63352399	1000	*	6172sicer	1.21612e-09	chr2	63349192	63380048	30857	-	intron:93844	uc002sce.3	51057	WDPCP	hg19_genes_introns
chr2	63351400	63352399	1000	*	6172sicer	1.21612e-09	chr2	63349192	63380048	30857	-	intron:93852	uc002scf.3	51057	WDPCP	hg19_genes_introns
chr2	63351400	63352399	1000	*	6172sicer	1.21612e-09	chr2	63349192	63380048	30857	-	intron:93863	uc010ypu.2	51057	WDPCP	hg19_genes_introns
chr2	63351400	63352399	1000	*	6172sicer	1.21612e-09	chr2	63349192	63380048	30857	-	intron:93874	uc002scg.3	51057	WDPCP	hg19_genes_introns
chr2	63351400	63352399	1000	*	6172sicer	1.21612e-09	chr2	63349192	63380048	30857	-	intron:93885	uc002sch.3	51057	WDPCP	hg19_genes_introns
chr2	178154600	178155599	1000	*	8008sicer	4.35345e-10	chr2	178099000	178187966	88967	-	intron:104424	uc002uli.5	4780	NFE2L2	hg19_genes_introns
chr2	178154600	178155599	1000	*	8008sicer	4.35345e-10	chr2	178152563	178175691	23129	-	intron:104432	uc002ulj.1	100130691	LOC100130691	hg19_genes_introns
chr2	231638600	231639599	1000	*	8800sicer	5.06333e-06	chr2	231624831	231655586	30756	+	intron:85615	uc002vqx.3	51719	CAB39	hg19_genes_introns
chr2	231638600	231639599	1000	*	8800sicer	5.06333e-06	chr2	231624831	231655586	30756	+	intron:85623	uc010fxq.3	51719	CAB39	hg19_genes_introns
chr2	231638600	231639599	1000	*	8800sicer	5.06333e-06	chr2	231624831	231655586	30756	+	intron:85631	uc010fxr.3	51719	CAB39	hg19_genes_introns
chr3	101851000	101851799	800	*	10611sicer	3.56e-15	chr3	101820416	101947189	126774	+	intron:123274	uc003dvs.1	131368	ZPLD1	hg19_genes_introns
chr3	101895400	101896199	800	*	10612sicer	8.11e-29	chr3	101820416	101947189	126774	+	intron:123274	uc003dvs.1	131368	ZPLD1	hg19_genes_introns
chr3	111809400	111809799	400	*	10696sicer	2.27117e-12	chr3	111805393	111812206	6814	+	intron:123865	uc003dyq.4	79669	C3orf52	hg19_genes_introns
chr3	111809400	111809799	400	*	10696sicer	2.27117e-12	chr3	111805393	111812206	6814	+	intron:123870	uc011bhs.2	79669	C3orf52	hg19_genes_introns
chr3	111809400	111809799	400	*	10696sicer	2.27117e-12	chr3	111805393	111812206	6814	+	intron:123873	uc011bht.1	79669	C3orf52	hg19_genes_introns
chr3	126637200	126637599	400	*	10996sicer	2.61483e-11	chr3	126633594	126676258	42665	+	intron:125273	uc010hsj.2	84303	CHCHD6	hg19_genes_introns
chr3	126637200	126637599	400	*	10996sicer	2.61483e-11	chr3	126633594	126676258	42665	+	intron:125279	uc003ejf.2	84303	CHCHD6	hg19_genes_introns
chr3	127304200	127305199	1000	*	11009sicer	1.43e-86	chr3	127299007	127309252	10246	-	intron:145160	uc003ejm.4	131601	TPRA1	hg19_genes_introns
chr3	127304200	127305199	1000	*	11009sicer	1.43e-86	chr3	127299007	127309252	10246	-	intron:145170	uc003ejn.3	131601	TPRA1	hg19_genes_introns
chr3	127304200	127305199	1000	*	11009sicer	1.43e-86	chr3	127299007	127309252	10246	-	intron:145178	uc010hsk.3	131601	TPRA1	hg19_genes_introns
chr3	196139400	196140199	800	*	12320sicer	4.43e-19	chr3	196134265	196159197	24933	-	intron:151034	uc003fwm.4	26043	UBXN7	hg19_genes_introns
chr3	196139400	196140199	800	*	12320sicer	4.43e-19	chr3	196129891	196159197	29307	-	intron:151043	uc003fwn.4	26043	UBXN7	hg19_genes_introns
chr3	196139400	196140199	800	*	12320sicer	4.43e-19	chr3	196098914	196159197	60284	-	intron:151049	uc010iae.3	26043	UBXN7	hg19_genes_introns
chr3	196139400	196140199	800	*	12320sicer	4.43e-19	chr3	196134265	196159197	24933	-	intron:151052	uc010iaf.3	26043	UBXN7	hg19_genes_introns
chr4	10014600	10014999	400	*	12588sicer	2.98756e-05	chr4	9998566	10020598	22033	-	intron:164388	uc003gmc.3	56606	SLC2A9	hg19_genes_introns
chr4	10014600	10014999	400	*	12588sicer	2.98756e-05	chr4	9998566	10020598	22033	-	intron:164399	uc003gmd.3	56606	SLC2A9	hg19_genes_introns
chr4	40969800	40970799	1000	*	12993sicer	2.19115e-06	chr4	40947088	41015599	68512	-	intron:165647	uc003gvl.3	323	APBB2	hg19_genes_introns
chr4	40969800	40970799	1000	*	12993sicer	2.19115e-06	chr4	40947088	41015599	68512	-	intron:165663	uc003gvm.3	323	APBB2	hg19_genes_introns
chr4	40969800	40970799	1000	*	12993sicer	2.19115e-06	chr4	40947091	41015599	68509	-	intron:165680	uc003gvn.3	323	APBB2	hg19_genes_introns
chr4	40969800	40970799	1000	*	12993sicer	2.19115e-06	chr4	40947088	41015599	68512	-	intron:165690	uc011byt.1	323	APBB2	hg19_genes_introns
chr4	113090600	113091999	1400	*	13763sicer	8.21553e-05	chr4	113066890	113107848	40959	+	intron:159355	uc003iah.2	132720	FAM241A	hg19_genes_introns
chr4	141924800	141925999	1200	*	14020sicer	3.56132e-05	chr4	141889028	142053478	164451	-	intron:171939	uc003iio.1	57484	RNF150	hg19_genes_introns
chr4	141924800	141925999	1200	*	14020sicer	3.56132e-05	chr4	141889028	142053478	164451	-	intron:171945	uc010iok.1	57484	RNF150	hg19_genes_introns
chr4	141924800	141925999	1200	*	14020sicer	3.56132e-05	chr4	141889028	142053478	164451	-	intron:171950	uc003iip.1	57484	RNF150	hg19_genes_introns
chr4	146024400	146024999	600	*	14057sicer	1.15e-46	chr4	146019572	146025540	5969	+	intron:160854	uc003ijx.3	6059	ABCE1	hg19_genes_introns
chr4	146024400	146024999	600	*	14057sicer	1.15e-46	chr4	146019572	146025537	5966	+	intron:160871	uc003ijy.3	6059	ABCE1	hg19_genes_introns
chr4	146024400	146024999	600	*	14057sicer	1.15e-46	chr4	146019572	146025537	5966	+	intron:160888	uc010iot.3	6059	ABCE1	hg19_genes_introns
chr4	166212400	166213799	1400	*	14284sicer	3.99e-133	chr4	166184512	166215510	30999	+	intron:162031	uc003irb.3	11275	KLHL2	hg19_genes_introns
chr4	166212400	166213799	1400	*	14284sicer	3.99e-133	chr4	166184512	166215510	30999	+	intron:162044	uc003irc.3	11275	KLHL2	hg19_genes_introns
chr4	166212400	166213799	1400	*	14284sicer	3.99e-133	chr4	166184512	166215510	30999	+	intron:162058	uc011cjm.2	11275	KLHL2	hg19_genes_introns
chr4	166212400	166213799	1400	*	14284sicer	3.99e-133	chr4	166184512	166215510	30999	+	intron:162068	uc010ira.3	11275	KLHL2	hg19_genes_introns
chr5	52218000	52218799	800	*	14981sicer	3.47e-20	chr5	52216299	52218606	2308	+	intron:176926	uc003jou.3	3672	ITGA1	hg19_genes_introns
chr5	52218000	52218799	800	*	14981sicer	3.47e-20	chr5	52218718	52221107	2390	+	intron:176927	uc003jou.3	3672	ITGA1	hg19_genes_introns
chr5	52218000	52218799	800	*	14981sicer	3.47e-20	chr5	52216303	52218606	2304	+	intron:176954	uc003jov.3	3672	ITGA1	hg19_genes_introns
chr5	52218000	52218799	800	*	14981sicer	3.47e-20	chr5	52218718	52221107	2390	+	intron:176955	uc003jov.3	3672	ITGA1	hg19_genes_introns
chr5	52218000	52218799	800	*	14981sicer	3.47e-20	chr5	52216299	52218606	2308	+	intron:176971	uc003jow.3	3672	ITGA1	hg19_genes_introns
chr5	52218000	52218799	800	*	14981sicer	3.47e-20	chr5	52218718	52221107	2390	+	intron:176972	uc003jow.3	3672	ITGA1	hg19_genes_introns
chr5	61629200	61629999	800	*	15180sicer	1.33188e-06	chr5	61604339	61642956	38618	+	intron:177533	uc003jsx.4	3796	KIF2A	hg19_genes_introns
chr5	61629200	61629999	800	*	15180sicer	1.33188e-06	chr5	61602364	61642956	40593	+	intron:177552	uc003jsy.4	3796	KIF2A	hg19_genes_introns
chr5	61629200	61629999	800	*	15180sicer	1.33188e-06	chr5	61602364	61642956	40593	+	intron:177571	uc003jsz.4	3796	KIF2A	hg19_genes_introns
chr5	61629200	61629999	800	*	15180sicer	1.33188e-06	chr5	61602364	61642956	40593	+	intron:177591	uc010iwp.3	3796	KIF2A	hg19_genes_introns
chr5	168217000	168218399	1400	*	16783sicer	4.18e-51	chr5	168216637	168222511	5875	-	intron:199855	uc003mab.4	6586	SLIT3	hg19_genes_introns
chr5	168217000	168218399	1400	*	16783sicer	4.18e-51	chr5	168216637	168222511	5875	-	intron:199890	uc010jjg.4	6586	SLIT3	hg19_genes_introns
chr5	168217000	168218399	1400	*	16783sicer	4.18e-51	chr5	168216637	168222511	5875	-	intron:199903	uc003mac.1	6586	SLIT3	hg19_genes_introns
chr5	168217000	168218399	1400	*	16783sicer	4.18e-51	chr5	168216637	168222511	5875	-	intron:199911	uc010jji.2	6586	SLIT3	hg19_genes_introns
chr5	171399800	171400799	1000	*	16848sicer	5.31756e-08	chr5	171341410	171423893	82484	-	intron:200001	uc011dey.1	23291	FBXW11	hg19_genes_introns
chr5	171399800	171400799	1000	*	16848sicer	5.31756e-08	chr5	171341410	171433461	92052	-	intron:200013	uc003mbl.1	23291	FBXW11	hg19_genes_introns
chr5	171399800	171400799	1000	*	16848sicer	5.31756e-08	chr5	171384703	171433461	48759	-	intron:200025	uc003mbm.1	23291	FBXW11	hg19_genes_introns
chr5	171399800	171400799	1000	*	16848sicer	5.31756e-08	chr5	171337802	171433461	95660	-	intron:200036	uc003mbn.1	23291	FBXW11	hg19_genes_introns
chr6	5532000	5532399	400	*	17271sicer	2.50142e-10	chr6	5431406	5545412	114007	+	intron:201917	uc010jnv.1	10667	FARS2	hg19_genes_introns
chr6	5532000	5532399	400	*	17271sicer	2.50142e-10	chr6	5431406	5545412	114007	+	intron:201923	uc003mwr.2	10667	FARS2	hg19_genes_introns
chr6	12037600	12038399	800	*	17449sicer	2.98985e-08	chr6	12015902	12089416	73515	+	intron:202289	uc003nac.3	3096	HIVEP1	hg19_genes_introns
chr6	15575800	15576599	800	*	17618sicer	8.6e-21	chr6	15533627	15593289	59663	-	intron:217090	uc003nbl.3	84062	DTNBP1	hg19_genes_introns
chr6	15575800	15576599	800	*	17618sicer	8.6e-21	chr6	15533627	15593289	59663	-	intron:217099	uc003nbm.3	84062	DTNBP1	hg19_genes_introns
chr6	15575800	15576599	800	*	17618sicer	8.6e-21	chr6	15533627	15593289	59663	-	intron:217108	uc031smv.1	84062	DTNBP1	hg19_genes_introns
chr6	15575800	15576599	800	*	17618sicer	8.6e-21	chr6	15533627	15593289	59663	-	intron:217116	uc031smw.1	84062	DTNBP1	hg19_genes_introns
chr6	15575800	15576599	800	*	17618sicer	8.6e-21	chr6	15533627	15593289	59663	-	intron:217122	uc003nbp.3	84062	DTNBP1	hg19_genes_introns
chr6	15575800	15576599	800	*	17618sicer	8.6e-21	chr6	15533627	15593289	59663	-	intron:217130	uc010jph.3	84062	DTNBP1	hg19_genes_introns
chr6	16636400	16636999	600	*	17660sicer	7.08969e-11	chr6	16586139	16658006	71868	-	intron:217142	uc003nbt.3	6310	ATXN1	hg19_genes_introns
chr6	16636400	16636999	600	*	17660sicer	7.08969e-11	chr6	16586139	16658006	71868	-	intron:217150	uc010jpi.3	6310	ATXN1	hg19_genes_introns
chr6	16636400	16636999	600	*	17660sicer	7.08969e-11	chr6	16586139	16658006	71868	-	intron:217156	uc010jpj.1	6310	ATXN1	hg19_genes_introns
chr6	16636400	16636999	600	*	17660sicer	7.08969e-11	chr6	16586139	16658006	71868	-	intron:217162	uc003nbu.1	6310	ATXN1	hg19_genes_introns
chr6	25618200	25619799	1600	*	17832sicer	3.01055e-06	chr6	25610410	25619674	9265	+	intron:202891	uc010jpy.3	55604	CARMIL1	hg19_genes_introns
chr6	25618200	25619799	1600	*	17832sicer	3.01055e-06	chr6	25610410	25619674	9265	+	intron:202927	uc011djw.2	55604	CARMIL1	hg19_genes_introns
chr6	146675600	146676199	600	*	19802sicer	1.26e-34	chr6	146673633	146678661	5029	+	intron:213802	uc010khv.2	2911	GRM1	hg19_genes_introns
chr6	146675600	146676199	600	*	19802sicer	1.26e-34	chr6	146673633	146678661	5029	+	intron:213811	uc010khw.2	2911	GRM1	hg19_genes_introns
chr6	146675600	146676199	600	*	19802sicer	1.26e-34	chr6	146673633	146678661	5029	+	intron:213819	uc003qll.3	2911	GRM1	hg19_genes_introns
chr6	146675600	146676199	600	*	19802sicer	1.26e-34	chr6	146673633	146678661	5029	+	intron:213827	uc011edz.2	2911	GRM1	hg19_genes_introns
chr6	146675600	146676199	600	*	19802sicer	1.26e-34	chr6	146673633	146678661	5029	+	intron:213835	uc011eea.2	2911	GRM1	hg19_genes_introns
chr6	154628000	154628199	200	*	19961sicer	2.04e-18	chr6	154627903	154651154	23252	-	intron:230905	uc003qpw.3	26034	IPCEF1	hg19_genes_introns
chr6	154628000	154628199	200	*	19961sicer	2.04e-18	chr6	154610891	154677805	66915	-	intron:230916	uc003qpx.3	26034	IPCEF1	hg19_genes_introns
chr6	154628000	154628199	200	*	19961sicer	2.04e-18	chr6	154610891	154677805	66915	-	intron:230927	uc010kjh.3	26034	IPCEF1	hg19_genes_introns
chr6	154628000	154628199	200	*	19961sicer	2.04e-18	chr6	154587099	154731476	144378	-	intron:230937	uc021zhc.1	26034	IPCEF1	hg19_genes_introns
chr6	154628000	154628199	200	*	19961sicer	2.04e-18	chr6	154587099	154731476	144378	-	intron:230956	uc021zhd.1	26034	IPCEF1	hg19_genes_introns
chr6	154628000	154628199	200	*	19961sicer	2.04e-18	chr6	154587099	154731476	144378	-	intron:230963	uc021zhe.1	26034	IPCEF1	hg19_genes_introns
chr7	45111000	45112999	2000	*	21103sicer	1.64e-105	chr7	45109561	45112324	2764	+	intron:235982	uc003tmn.3	83605	CCM2	hg19_genes_introns
chr7	45111000	45112999	2000	*	21103sicer	1.64e-105	chr7	45112383	45113058	676	+	intron:235983	uc003tmn.3	83605	CCM2	hg19_genes_introns
chr7	45111000	45112999	2000	*	21103sicer	1.64e-105	chr7	45109561	45112324	2764	+	intron:235991	uc003tmo.3	83605	CCM2	hg19_genes_introns
chr7	45111000	45112999	2000	*	21103sicer	1.64e-105	chr7	45112383	45113058	676	+	intron:235992	uc003tmo.3	83605	CCM2	hg19_genes_introns
chr7	45111000	45112999	2000	*	21103sicer	1.64e-105	chr7	45109561	45112324	2764	+	intron:235999	uc003tmp.3	83605	CCM2	hg19_genes_introns
chr7	45111000	45112999	2000	*	21103sicer	1.64e-105	chr7	45112383	45113058	676	+	intron:236000	uc003tmp.3	83605	CCM2	hg19_genes_introns
chr7	45111000	45112999	2000	*	21103sicer	1.64e-105	chr7	45104246	45112324	8079	+	intron:236006	uc003tmr.3	83605	CCM2	hg19_genes_introns
chr7	45111000	45112999	2000	*	21103sicer	1.64e-105	chr7	45112383	45113058	676	+	intron:236007	uc003tmr.3	83605	CCM2	hg19_genes_introns
chr7	45111000	45112999	2000	*	21103sicer	1.64e-105	chr7	45109561	45112324	2764	+	intron:236018	uc011kcc.2	83605	CCM2	hg19_genes_introns
chr7	45111000	45112999	2000	*	21103sicer	1.64e-105	chr7	45109561	45112324	2764	+	intron:236024	uc003tms.3	83605	CCM2	hg19_genes_introns
chr7	45111000	45112999	2000	*	21103sicer	1.64e-105	chr7	45112383	45113058	676	+	intron:236025	uc003tms.3	83605	CCM2	hg19_genes_introns
chr7	112518000	112519199	1200	*	21960sicer	1.04e-20	chr7	112472731	112535623	62893	-	intron:258068	uc003vgo.1	154743	BMT2	hg19_genes_introns
chr7	112518000	112519199	1200	*	21960sicer	1.04e-20	chr7	112472731	112535623	62893	-	intron:258072	uc011kms.1	154743	BMT2	hg19_genes_introns
chr7	139343600	139344199	600	*	22335sicer	8.41081e-06	chr7	139316472	139415730	99259	-	intron:259890	uc003vvd.4	28996	HIPK2	hg19_genes_introns
chr7	139343600	139344199	600	*	22335sicer	8.41081e-06	chr7	139316472	139415730	99259	-	intron:259904	uc003vvf.4	28996	HIPK2	hg19_genes_introns
chr9	95508000	95508599	600	*	25808sicer	8.23e-125	chr9	95491519	95526786	35268	-	intron:300790	uc004aso.1	23299	BICD2	hg19_genes_introns
chr9	95508000	95508599	600	*	25808sicer	8.23e-125	chr9	95491519	95526786	35268	-	intron:300796	uc004asp.1	23299	BICD2	hg19_genes_introns
chr9	112077000	112078999	2000	*	26143sicer	1.05e-17	chr9	112042202	112082420	40219	-	intron:302075	uc004bdz.1	54566	EPB41L4B	hg19_genes_introns
chr9	112077000	112078999	2000	*	26143sicer	1.05e-17	chr9	112042202	112082420	40219	-	intron:302090	uc004bea.3	54566	EPB41L4B	hg19_genes_introns
chr9	124023400	124024399	1000	*	26377sicer	4.85084e-11	chr9	124010602	124027431	16830	+	intron:289499	uc004bld.1	2934	GSN	hg19_genes_introns
chr9	124025200	124026199	1000	*	26377sicer	4.85084e-11	chr9	124010602	124027431	16830	+	intron:289499	uc004bld.1	2934	GSN	hg19_genes_introns
chr9	133918200	133918999	800	*	26750sicer	9.83487e-08	chr9	133917123	133920910	3788	+	intron:292396	uc004caa.1	10319	LAMC3	hg19_genes_introns
chr10	21310600	21312399	1800	*	27366sicer	2.52e-35	chr10	21309131	21461311	152181	-	intron:323344	uc001iqk.3	10529	NEBL	hg19_genes_introns
chr10	21310600	21312399	1800	*	27366sicer	2.52e-35	chr10	21309131	21461311	152181	-	intron:323350	uc021pnu.1	10529	NEBL	hg19_genes_introns
chr10	27140000	27141399	1400	*	27484sicer	2e-14	chr10	27112235	27149675	37441	-	intron:323527	uc001isx.3	10006	ABI1	hg19_genes_introns
chr10	27140000	27141399	1400	*	27484sicer	2e-14	chr10	27112235	27149675	37441	-	intron:323537	uc001isy.3	10006	ABI1	hg19_genes_introns
chr10	27140000	27141399	1400	*	27484sicer	2e-14	chr10	27112235	27149675	37441	-	intron:323546	uc001isz.3	10006	ABI1	hg19_genes_introns
chr10	27140000	27141399	1400	*	27484sicer	2e-14	chr10	27112235	27149675	37441	-	intron:323555	uc001ita.3	10006	ABI1	hg19_genes_introns
chr10	27140000	27141399	1400	*	27484sicer	2e-14	chr10	27128713	27149675	20963	-	intron:323566	uc001itb.3	10006	ABI1	hg19_genes_introns
chr10	27140000	27141399	1400	*	27484sicer	2e-14	chr10	27112235	27149675	37441	-	intron:323576	uc001itc.3	10006	ABI1	hg19_genes_introns
chr10	27140000	27141399	1400	*	27484sicer	2e-14	chr10	27112235	27149675	37441	-	intron:323585	uc001itd.3	10006	ABI1	hg19_genes_introns
chr10	27140000	27141399	1400	*	27484sicer	2e-14	chr10	27112235	27149675	37441	-	intron:323593	uc001ite.3	10006	ABI1	hg19_genes_introns
chr10	27140000	27141399	1400	*	27484sicer	2e-14	chr10	27112235	27149675	37441	-	intron:323600	uc010qdh.2	10006	ABI1	hg19_genes_introns
chr10	27140000	27141399	1400	*	27484sicer	2e-14	chr10	27112235	27149675	37441	-	intron:323606	uc010qdi.2	10006	ABI1	hg19_genes_introns
chr10	27140000	27141399	1400	*	27484sicer	2e-14	chr10	27112235	27149675	37441	-	intron:323615	uc010qdj.2	10006	ABI1	hg19_genes_introns
chr10	27140000	27141399	1400	*	27484sicer	2e-14	chr10	27112235	27149675	37441	-	intron:323623	uc010qdk.2	10006	ABI1	hg19_genes_introns
chr10	28567800	28568799	1000	*	27518sicer	2.39289e-11	chr10	28543806	28569028	25223	-	intron:323982	uc001iua.1	143098	MPP7	hg19_genes_introns
chr10	28567800	28568799	1000	*	27518sicer	2.39289e-11	chr10	28527665	28570938	43274	-	intron:323999	uc001iub.1	143098	MPP7	hg19_genes_introns
chr10	28567800	28568799	1000	*	27518sicer	2.39289e-11	chr10	28527665	28591789	64125	-	intron:324015	uc009xla.2	143098	MPP7	hg19_genes_introns
chr10	28567800	28568799	1000	*	27518sicer	2.39289e-11	chr10	28527665	28591789	64125	-	intron:324030	uc010qdv.1	143098	MPP7	hg19_genes_introns
chr10	86123000	86123399	400	*	28423sicer	1.39e-14	chr10	86088565	86130769	42205	+	intron:315359	uc001kdg.1	54462	CCSER2	hg19_genes_introns
chr10	86123000	86123399	400	*	28423sicer	1.39e-14	chr10	86088565	86130769	42205	+	intron:315361	uc001kdh.1	54462	CCSER2	hg19_genes_introns
chr10	86123000	86123399	400	*	28423sicer	1.39e-14	chr10	86088565	86130769	42205	+	intron:315371	uc010qmd.1	54462	CCSER2	hg19_genes_introns
chr10	114723400	114724399	1000	*	29023sicer	6.75e-64	chr10	114711367	114799783	88417	+	intron:318848	uc001lac.4	6934	TCF7L2	hg19_genes_introns
chr10	114723400	114724399	1000	*	29023sicer	6.75e-64	chr10	114711367	114799783	88417	+	intron:318861	uc001lad.4	6934	TCF7L2	hg19_genes_introns
chr10	114723400	114724399	1000	*	29023sicer	6.75e-64	chr10	114711367	114724314	12948	+	intron:318873	uc001lae.4	6934	TCF7L2	hg19_genes_introns
chr10	114723400	114724399	1000	*	29023sicer	6.75e-64	chr10	114724384	114799783	75400	+	intron:318874	uc001lae.4	6934	TCF7L2	hg19_genes_introns
chr10	114723400	114724399	1000	*	29023sicer	6.75e-64	chr10	114711367	114799783	88417	+	intron:318886	uc001laf.4	6934	TCF7L2	hg19_genes_introns
chr10	114723400	114724399	1000	*	29023sicer	6.75e-64	chr10	114711367	114799783	88417	+	intron:318898	uc001lag.4	6934	TCF7L2	hg19_genes_introns
chr10	114723400	114724399	1000	*	29023sicer	6.75e-64	chr10	114711367	114799783	88417	+	intron:318910	uc001lah.3	6934	TCF7L2	hg19_genes_introns
chr10	114723400	114724399	1000	*	29023sicer	6.75e-64	chr10	114711367	114799783	88417	+	intron:318924	uc010qrk.2	6934	TCF7L2	hg19_genes_introns
chr10	114723400	114724399	1000	*	29023sicer	6.75e-64	chr10	114711367	114799783	88417	+	intron:318936	uc010qrl.2	6934	TCF7L2	hg19_genes_introns
chr10	114723400	114724399	1000	*	29023sicer	6.75e-64	chr10	114711367	114724314	12948	+	intron:318948	uc010qrm.2	6934	TCF7L2	hg19_genes_introns
chr10	114723400	114724399	1000	*	29023sicer	6.75e-64	chr10	114724384	114799783	75400	+	intron:318949	uc010qrm.2	6934	TCF7L2	hg19_genes_introns
chr10	114723400	114724399	1000	*	29023sicer	6.75e-64	chr10	114711367	114900942	189576	+	intron:318960	uc010qrn.2	6934	TCF7L2	hg19_genes_introns
chr10	114723400	114724399	1000	*	29023sicer	6.75e-64	chr10	114711367	114799783	88417	+	intron:318970	uc010qro.2	6934	TCF7L2	hg19_genes_introns
chr10	114723400	114724399	1000	*	29023sicer	6.75e-64	chr10	114711367	114799783	88417	+	intron:318981	uc010qrp.2	6934	TCF7L2	hg19_genes_introns
chr10	114723400	114724399	1000	*	29023sicer	6.75e-64	chr10	114711367	114799783	88417	+	intron:318995	uc010qrq.2	6934	TCF7L2	hg19_genes_introns
chr10	114723400	114724399	1000	*	29023sicer	6.75e-64	chr10	114711367	114799783	88417	+	intron:319009	uc021pyg.1	6934	TCF7L2	hg19_genes_introns
chr10	114723400	114724399	1000	*	29023sicer	6.75e-64	chr10	114711367	114799783	88417	+	intron:319023	uc021pyh.1	6934	TCF7L2	hg19_genes_introns
chr10	114723400	114724399	1000	*	29023sicer	6.75e-64	chr10	114711367	114724314	12948	+	intron:319035	uc021pyi.1	6934	TCF7L2	hg19_genes_introns
chr10	114723400	114724399	1000	*	29023sicer	6.75e-64	chr10	114724384	114799783	75400	+	intron:319036	uc021pyi.1	6934	TCF7L2	hg19_genes_introns
chr10	114723400	114724399	1000	*	29023sicer	6.75e-64	chr10	114711367	114724314	12948	+	intron:319049	uc021pyj.1	6934	TCF7L2	hg19_genes_introns
chr10	114723400	114724399	1000	*	29023sicer	6.75e-64	chr10	114724384	114799783	75400	+	intron:319050	uc021pyj.1	6934	TCF7L2	hg19_genes_introns
chr10	114723400	114724399	1000	*	29023sicer	6.75e-64	chr10	114711367	114799783	88417	+	intron:319062	uc021pyk.1	6934	TCF7L2	hg19_genes_introns
chr10	114723400	114724399	1000	*	29023sicer	6.75e-64	chr10	114711367	114799783	88417	+	intron:319074	uc021pyl.1	6934	TCF7L2	hg19_genes_introns
chr10	114723400	114724399	1000	*	29023sicer	6.75e-64	chr10	114711367	114799783	88417	+	intron:319085	uc021pym.1	6934	TCF7L2	hg19_genes_introns
chr10	114723400	114724399	1000	*	29023sicer	6.75e-64	chr10	114711367	114724314	12948	+	intron:319096	uc021pyn.1	6934	TCF7L2	hg19_genes_introns
chr10	114723400	114724399	1000	*	29023sicer	6.75e-64	chr10	114724384	114799783	75400	+	intron:319097	uc021pyn.1	6934	TCF7L2	hg19_genes_introns
chr10	114723400	114724399	1000	*	29023sicer	6.75e-64	chr10	114711367	114724314	12948	+	intron:319109	uc021pyo.1	6934	TCF7L2	hg19_genes_introns
chr10	114723400	114724399	1000	*	29023sicer	6.75e-64	chr10	114724384	114799783	75400	+	intron:319110	uc021pyo.1	6934	TCF7L2	hg19_genes_introns
chr10	114723400	114724399	1000	*	29023sicer	6.75e-64	chr10	114711367	114724314	12948	+	intron:319121	uc021pyp.1	6934	TCF7L2	hg19_genes_introns
chr10	114723400	114724399	1000	*	29023sicer	6.75e-64	chr10	114724384	114799783	75400	+	intron:319122	uc021pyp.1	6934	TCF7L2	hg19_genes_introns
chr10	114723400	114724399	1000	*	29023sicer	6.75e-64	chr10	114711367	114799783	88417	+	intron:319132	uc010qrr.2	6934	TCF7L2	hg19_genes_introns
chr10	114723400	114724399	1000	*	29023sicer	6.75e-64	chr10	114711367	114799783	88417	+	intron:319145	uc010qrs.2	6934	TCF7L2	hg19_genes_introns
chr10	114723400	114724399	1000	*	29023sicer	6.75e-64	chr10	114711367	114799783	88417	+	intron:319157	uc010qrt.2	6934	TCF7L2	hg19_genes_introns
chr11	3164000	3164399	400	*	29528sicer	1.27e-233	chr11	3150400	3186445	36046	-	intron:355880	uc001lxk.2	114879	OSBPL5	hg19_genes_introns
chr11	3164000	3164399	400	*	29528sicer	1.27e-233	chr11	3150400	3186452	36053	-	intron:355900	uc001lxl.2	114879	OSBPL5	hg19_genes_introns
chr11	3164000	3164399	400	*	29528sicer	1.27e-233	chr11	3150400	3186445	36046	-	intron:355920	uc009ydw.2	114879	OSBPL5	hg19_genes_introns
chr11	3164000	3164399	400	*	29528sicer	1.27e-233	chr11	3150400	3187854	37455	-	intron:355936	uc009ydx.3	114879	OSBPL5	hg19_genes_introns
chr11	9724600	9725199	600	*	29681sicer	1.82e-18	chr11	9715834	9735012	19179	+	intron:338716	uc001mhv.3	23075	SWAP70	hg19_genes_introns
chr11	9724600	9725199	600	*	29681sicer	1.82e-18	chr11	9715834	9735012	19179	+	intron:338724	uc001mhw.3	23075	SWAP70	hg19_genes_introns
chr11	9724600	9725199	600	*	29681sicer	1.82e-18	chr11	9715834	9746204	30371	+	intron:338735	uc001mhx.3	23075	SWAP70	hg19_genes_introns
chr12	12491600	12492199	600	*	32258sicer	7.76e-17	chr12	12491495	12496025	4531	-	intron:390308	uc001rai.1	54682	MANSC1	hg19_genes_introns
chr12	12491600	12492199	600	*	32258sicer	7.76e-17	chr12	12491495	12496025	4531	-	intron:390311	uc001raj.1	54682	MANSC1	hg19_genes_introns
chr12	42518800	42520199	1400	*	32617sicer	2.28666e-06	chr12	42512974	42523560	10587	-	intron:392322	uc001rms.4	283464	GXYLT1	hg19_genes_introns
chr12	42518800	42520199	1400	*	32617sicer	2.28666e-06	chr12	42512974	42538227	25254	-	intron:392329	uc001rmt.4	283464	GXYLT1	hg19_genes_introns
chr12	47525400	47525999	600	*	32689sicer	1.68957e-10	chr12	47497979	47610004	112026	+	intron:376698	uc001rpn.3	91523	PCED1B	hg19_genes_introns
chr12	64379000	64379999	1000	*	33193sicer	3.3e-15	chr12	64377923	64383689	5767	+	intron:380690	uc001srt.3	57522	SRGAP1	hg19_genes_introns
chr12	64379000	64379999	1000	*	33193sicer	3.3e-15	chr12	64377923	64383689	5767	+	intron:380699	uc010ssp.1	57522	SRGAP1	hg19_genes_introns
chr12	64379000	64379999	1000	*	33193sicer	3.3e-15	chr12	64377923	64383689	5767	+	intron:380719	uc001srv.2	57522	SRGAP1	hg19_genes_introns
chr12	111757000	111757599	600	*	33995sicer	5.29e-111	chr12	111750006	111757815	7810	+	intron:385385	uc001tsa.2	23316	CUX2	hg19_genes_introns
chr12	133274800	133275399	600	*	34489sicer	4.86165e-12	chr12	133272633	133277835	5203	+	intron:387949	uc001ukt.3	5827	PXMP2	hg19_genes_introns
chr12	133274800	133275399	600	*	34489sicer	4.86165e-12	chr12	133266963	133277835	10873	+	intron:387952	uc010tbr.2	192111	PGAM5	hg19_genes_introns
chr13	48954400	48955199	800	*	35034sicer	3.3e-17	chr13	48954378	48955382	1005	+	intron:407782	uc001vcb.3	5925	RB1	hg19_genes_introns
chr13	114866800	114867199	400	*	35641sicer	2.57e-23	chr13	114839313	114897909	58597	-	intron:416155	uc001vui.3	22821	RASA3	hg19_genes_introns
chr13	114866800	114867199	400	*	35641sicer	2.57e-23	chr13	114839313	114897909	58597	-	intron:416180	uc001vuj.3	22821	RASA3	hg19_genes_introns
chr13	114866800	114867199	400	*	35641sicer	2.57e-23	chr13	114839313	114897909	58597	-	intron:416190	uc010tkl.1	22821	RASA3	hg19_genes_introns
chr14	64925600	64926599	1000	*	36281sicer	4.98e-24	chr14	64925026	64926476	1451	+	intron:421527	uc001xhb.3	4522	MTHFD1	hg19_genes_introns
chr14	64925600	64926599	1000	*	36281sicer	4.98e-24	chr14	64921594	64926476	4883	+	intron:421553	uc010aqf.3	4522	MTHFD1	hg19_genes_introns
chr14	64925600	64926599	1000	*	36281sicer	4.98e-24	chr14	64916357	64957078	40722	-	intron:431953	uc001xhc.3	7597	ZBTB25	hg19_genes_introns
chr14	69378600	69379199	600	*	36395sicer	9.88e-22	chr14	69376760	69378872	2113	-	intron:432405	uc010ttb.2	87	ACTN1	hg19_genes_introns
chr14	69378600	69379199	600	*	36395sicer	9.88e-22	chr14	69378960	69387722	8763	-	intron:432406	uc010ttb.2	87	ACTN1	hg19_genes_introns
chr14	69378600	69379199	600	*	36395sicer	9.88e-22	chr14	69376760	69378872	2113	-	intron:432425	uc001xkl.3	87	ACTN1	hg19_genes_introns
chr14	69378600	69379199	600	*	36395sicer	9.88e-22	chr14	69378960	69387722	8763	-	intron:432426	uc001xkl.3	87	ACTN1	hg19_genes_introns
chr14	69378600	69379199	600	*	36395sicer	9.88e-22	chr14	69376760	69378872	2113	-	intron:432446	uc001xkm.3	87	ACTN1	hg19_genes_introns
chr14	69378600	69379199	600	*	36395sicer	9.88e-22	chr14	69378960	69387722	8763	-	intron:432447	uc001xkm.3	87	ACTN1	hg19_genes_introns
chr14	69378600	69379199	600	*	36395sicer	9.88e-22	chr14	69376760	69378872	2113	-	intron:432466	uc001xkn.3	87	ACTN1	hg19_genes_introns
chr14	69378600	69379199	600	*	36395sicer	9.88e-22	chr14	69378960	69387722	8763	-	intron:432467	uc001xkn.3	87	ACTN1	hg19_genes_introns
chr14	69378600	69379199	600	*	36395sicer	9.88e-22	chr14	69376760	69378872	2113	-	intron:432486	uc001xko.1	87	ACTN1	hg19_genes_introns
chr14	69378600	69379199	600	*	36395sicer	9.88e-22	chr14	69378960	69387722	8763	-	intron:432487	uc001xko.1	87	ACTN1	hg19_genes_introns
chr14	69378600	69379199	600	*	36395sicer	9.88e-22	chr14	69376760	69378872	2113	-	intron:432498	uc010ttd.1	87	ACTN1	hg19_genes_introns
chr14	69378600	69379199	600	*	36395sicer	9.88e-22	chr14	69378960	69387722	8763	-	intron:432499	uc010ttd.1	87	ACTN1	hg19_genes_introns
chr14	69385600	69385999	400	*	36396sicer	7.34e-19	chr14	69378960	69387722	8763	-	intron:432406	uc010ttb.2	87	ACTN1	hg19_genes_introns
chr14	69385600	69385999	400	*	36396sicer	7.34e-19	chr14	69378960	69387722	8763	-	intron:432426	uc001xkl.3	87	ACTN1	hg19_genes_introns
chr14	69385600	69385999	400	*	36396sicer	7.34e-19	chr14	69378960	69387722	8763	-	intron:432447	uc001xkm.3	87	ACTN1	hg19_genes_introns
chr14	69385600	69385999	400	*	36396sicer	7.34e-19	chr14	69378960	69387722	8763	-	intron:432467	uc001xkn.3	87	ACTN1	hg19_genes_introns
chr14	69385600	69385999	400	*	36396sicer	7.34e-19	chr14	69378960	69387722	8763	-	intron:432487	uc001xko.1	87	ACTN1	hg19_genes_introns
chr14	69385600	69385999	400	*	36396sicer	7.34e-19	chr14	69378960	69387722	8763	-	intron:432499	uc010ttd.1	87	ACTN1	hg19_genes_introns
chr14	74328000	74328799	800	*	36520sicer	2.2e-45	chr14	74327361	74340725	13365	+	intron:423197	uc001xow.3	145482	PTGR2	hg19_genes_introns
chr14	74328000	74328799	800	*	36520sicer	2.2e-45	chr14	74327361	74340725	13365	+	intron:423206	uc010tue.2	145482	PTGR2	hg19_genes_introns
chr14	74328000	74328799	800	*	36520sicer	2.2e-45	chr14	74327361	74340725	13365	+	intron:423215	uc001xox.3	145482	PTGR2	hg19_genes_introns
chr14	74328000	74328799	800	*	36520sicer	2.2e-45	chr14	74327361	74340725	13365	+	intron:423224	uc001xoy.2	57862	ZNF410	hg19_genes_introns
chr14	76066200	76066999	800	*	36598sicer	0	chr14	76045985	76088421	42437	+	intron:423598	uc001xrs.2	55640	FLVCR2	hg19_genes_introns
chr14	93755200	93755999	800	*	36906sicer	1.92e-14	chr14	93728024	93760203	32180	-	intron:435057	uc010aur.3	55727	BTBD7	hg19_genes_introns
chr14	93755200	93755999	800	*	36906sicer	1.92e-14	chr14	93723702	93760203	36502	-	intron:435063	uc010two.2	55727	BTBD7	hg19_genes_introns
chr14	93755200	93755999	800	*	36906sicer	1.92e-14	chr14	93730340	93760203	29864	-	intron:435071	uc001ybo.3	55727	BTBD7	hg19_genes_introns
chr14	93755200	93755999	800	*	36906sicer	1.92e-14	chr14	93730340	93799165	68826	-	intron:435081	uc001ybp.3	55727	BTBD7	hg19_genes_introns
chr14	93755200	93755999	800	*	36906sicer	1.92e-14	chr14	93730340	93760203	29864	-	intron:435084	uc001ybq.4	55727	BTBD7	hg19_genes_introns
chr14	93755200	93755999	800	*	36906sicer	1.92e-14	chr14	93755054	93760203	5150	-	intron:435085	uc001ybr.3	55727	BTBD7	hg19_genes_introns
chr15	31421200	31421799	600	*	37264sicer	8.21553e-05	chr15	31369188	31453108	83921	-	intron:453073	uc021sia.1	4308	TRPM1	hg19_genes_introns
chr15	51901800	51902599	800	*	37653sicer	2.35661e-12	chr15	51868379	51914655	46277	-	intron:456820	uc002abf.3	23312	DMXL2	hg19_genes_introns
chr15	51901800	51902599	800	*	37653sicer	2.35661e-12	chr15	51868379	51914655	46277	-	intron:456860	uc010bfa.3	23312	DMXL2	hg19_genes_introns
chr15	51901800	51902599	800	*	37653sicer	2.35661e-12	chr15	51868379	51914655	46277	-	intron:456902	uc010ufy.2	23312	DMXL2	hg19_genes_introns
chr15	51901800	51902599	800	*	37653sicer	2.35661e-12	chr15	51868379	51914655	46277	-	intron:456904	uc002abg.3	23312	DMXL2	hg19_genes_introns
chr15	75113600	75114199	600	*	38265sicer	1.68e-14	chr15	75113568	75114169	602	+	intron:448279	uc002ayt.1	79748	LMAN1L	hg19_genes_introns
chr15	75113600	75114199	600	*	38265sicer	1.68e-14	chr15	75113568	75114169	602	+	intron:448291	uc010bke.1	79748	LMAN1L	hg19_genes_introns
chr15	89178600	89179399	800	*	38546sicer	6.17e-116	chr15	89178932	89193465	14534	+	intron:450273	uc002bmu.1	3669	ISG20	hg19_genes_introns
chr15	92508200	92509199	1000	*	38685sicer	3.28496e-09	chr15	92459689	92638110	178422	+	intron:451224	uc002bqx.2	28232	SLCO3A1	hg19_genes_introns
chr15	92508200	92509199	1000	*	38685sicer	3.28496e-09	chr15	92459689	92638110	178422	+	intron:451233	uc002bqy.2	28232	SLCO3A1	hg19_genes_introns
chr15	92508200	92509199	1000	*	38685sicer	3.28496e-09	chr15	92459689	92638110	178422	+	intron:451243	uc010boc.1	28232	SLCO3A1	hg19_genes_introns
chr15	92508200	92509199	1000	*	38685sicer	3.28496e-09	chr15	92459689	92638110	178422	+	intron:451254	uc002bqz.1	28232	SLCO3A1	hg19_genes_introns
chr16	57504200	57504999	800	*	39905sicer	3.0138e-08	chr16	57504267	57504886	620	+	intron:473302	uc002elt.1	5432	POLR2C	hg19_genes_introns
chr16	88674400	88674999	600	*	40512sicer	1.54e-17	chr16	88666357	88675341	8985	+	intron:477381	uc021tmm.1	124245	ZC3H18	hg19_genes_introns
chr16	88674400	88674999	600	*	40512sicer	1.54e-17	chr16	88666357	88675341	8985	+	intron:477388	uc010voy.1	124245	ZC3H18	hg19_genes_introns
chr16	88674400	88674999	600	*	40512sicer	1.54e-17	chr16	88666357	88675341	8985	+	intron:477395	uc002fky.3	124245	ZC3H18	hg19_genes_introns
chr16	88674400	88674999	600	*	40512sicer	1.54e-17	chr16	88666357	88675341	8985	+	intron:477413	uc010voz.2	124245	ZC3H18	hg19_genes_introns
chr16	89369000	89369199	200	*	40546sicer	9.71e-36	chr16	89357592	89371613	14022	-	intron:489287	uc002fmx.2	29123	ANKRD11	hg19_genes_introns
chr16	89369000	89369199	200	*	40546sicer	9.71e-36	chr16	89357592	89371613	14022	-	intron:489299	uc002fmy.2	29123	ANKRD11	hg19_genes_introns
chr16	89369000	89369199	200	*	40546sicer	9.71e-36	chr16	89357592	89371613	14022	-	intron:489312	uc002fnc.2	29123	ANKRD11	hg19_genes_introns
chr16	89369000	89369199	200	*	40546sicer	9.71e-36	chr16	89358186	89371613	13428	-	intron:489325	uc002fne.4	29123	ANKRD11	hg19_genes_introns
chr16	89369000	89369199	200	*	40546sicer	9.71e-36	chr16	89358186	89371613	13428	-	intron:489333	uc002fnd.3	29123	ANKRD11	hg19_genes_introns
chr16	89369000	89369199	200	*	40546sicer	9.71e-36	chr16	89367371	89371613	4243	-	intron:489336	uc002fnf.1	29123	ANKRD11	hg19_genes_introns
chr16	89369000	89369199	200	*	40546sicer	9.71e-36	chr16	89367371	89371613	4243	-	intron:489339	uc002fng.1	29123	ANKRD11	hg19_genes_introns
chr17	40293200	40294999	1800	*	41739sicer	4.23e-20	chr17	40289897	40306910	17014	-	intron:517051	uc002hyz.3	5878	RAB5C	hg19_genes_introns
chr17	40293200	40294999	1800	*	41739sicer	4.23e-20	chr17	40282609	40306910	24302	-	intron:517056	uc002hza.3	5878	RAB5C	hg19_genes_introns
chr17	40293200	40294999	1800	*	41739sicer	4.23e-20	chr17	40283841	40306910	23070	-	intron:517062	uc010cxx.3	5878	RAB5C	hg19_genes_introns
chr18	6315400	6316399	1000	*	43204sicer	3.76e-17	chr18	6312056	6367612	55557	-	intron:531335	uc002kmz.4	91133	L3MBTL4	hg19_genes_introns
chr18	6315400	6316399	1000	*	43204sicer	3.76e-17	chr18	6312056	6414799	102744	-	intron:531354	uc010dkt.3	91133	L3MBTL4	hg19_genes_introns
chr18	9180800	9183599	2800	*	43231sicer	1.37534e-12	chr18	9136964	9182379	45416	+	intron:526391	uc010wzn.2	23253	ANKRD12	hg19_genes_introns
chr18	9180800	9183599	2800	*	43231sicer	1.37534e-12	chr18	9182518	9195548	13031	+	intron:526392	uc010wzn.2	23253	ANKRD12	hg19_genes_introns
chr18	9180800	9183599	2800	*	43231sicer	1.37534e-12	chr18	9136964	9182379	45416	+	intron:526399	uc002knv.3	23253	ANKRD12	hg19_genes_introns
chr18	9180800	9183599	2800	*	43231sicer	1.37534e-12	chr18	9182518	9195548	13031	+	intron:526400	uc002knv.3	23253	ANKRD12	hg19_genes_introns
chr18	9180800	9183599	2800	*	43231sicer	1.37534e-12	chr18	9136964	9182379	45416	+	intron:526411	uc002knw.3	23253	ANKRD12	hg19_genes_introns
chr18	9180800	9183599	2800	*	43231sicer	1.37534e-12	chr18	9182518	9195548	13031	+	intron:526412	uc002knw.3	23253	ANKRD12	hg19_genes_introns
chr18	9180800	9183599	2800	*	43231sicer	1.37534e-12	chr18	9137872	9182379	44508	+	intron:526422	uc002knx.3	23253	ANKRD12	hg19_genes_introns
chr18	9180800	9183599	2800	*	43231sicer	1.37534e-12	chr18	9182518	9195548	13031	+	intron:526423	uc002knx.3	23253	ANKRD12	hg19_genes_introns
chr18	21584000	21584599	600	*	43441sicer	1.15e-14	chr18	21573003	21644103	71101	+	intron:527707	uc002kuu.3	125488	TTC39C	hg19_genes_introns
chr18	56206000	56206199	200	*	43801sicer	3.36e-64	chr18	56205457	56246045	40589	-	intron:534829	uc002lhj.4	115701	ALPK2	hg19_genes_introns
chr19	3544800	3545399	600	*	44231sicer	0	chr19	3542976	3544806	1831	-	intron:552905	uc002lxw.3	126321	MFSD12	hg19_genes_introns
chr19	3544800	3545399	600	*	44231sicer	0	chr19	3544938	3546071	1134	-	intron:552906	uc002lxw.3	126321	MFSD12	hg19_genes_introns
chr19	3544800	3545399	600	*	44231sicer	0	chr19	3538755	3544806	6052	-	intron:552914	uc002lxx.3	126321	MFSD12	hg19_genes_introns
chr19	3544800	3545399	600	*	44231sicer	0	chr19	3544938	3546071	1134	-	intron:552915	uc002lxx.3	126321	MFSD12	hg19_genes_introns
chr19	3544800	3545399	600	*	44231sicer	0	chr19	3544731	3544806	76	-	intron:552923	uc002lxy.3	126321	MFSD12	hg19_genes_introns
chr19	3544800	3545399	600	*	44231sicer	0	chr19	3544938	3546071	1134	-	intron:552924	uc002lxy.3	126321	MFSD12	hg19_genes_introns
chr19	3544800	3545399	600	*	44231sicer	0	chr19	3544731	3544806	76	-	intron:552932	uc002lxz.3	126321	MFSD12	hg19_genes_introns
chr19	3544800	3545399	600	*	44231sicer	0	chr19	3544938	3546071	1134	-	intron:552933	uc002lxz.3	126321	MFSD12	hg19_genes_introns
chr20	1560600	1560799	200	*	46119sicer	3.13e-63	chr20	1559341	1600514	41174	-	intron:575875	uc002wfk.4	10326	SIRPB1	hg19_genes_introns
chr20	1560600	1560799	200	*	46119sicer	3.13e-63	chr20	1559341	1600514	41174	-	intron:575880	uc010gai.3	10326	SIRPB1	hg19_genes_introns
chr20	1907000	1907999	1000	*	46139sicer	0.00104713	chr20	1905524	1908520	2997	+	intron:567687	uc002wfq.3	140885	SIRPA	hg19_genes_introns
chr20	1907000	1907999	1000	*	46139sicer	0.00104713	chr20	1905524	1908520	2997	+	intron:567695	uc010zps.2	140885	SIRPA	hg19_genes_introns
chr20	1907000	1907999	1000	*	46139sicer	0.00104713	chr20	1905524	1908520	2997	+	intron:567703	uc002wfr.3	140885	SIRPA	hg19_genes_introns
chr20	1907000	1907999	1000	*	46139sicer	0.00104713	chr20	1905524	1908520	2997	+	intron:567710	uc002wfs.3	140885	SIRPA	hg19_genes_introns
chr20	1907000	1907999	1000	*	46139sicer	0.00104713	chr20	1905524	1908520	2997	+	intron:567717	uc002wft.3	140885	SIRPA	hg19_genes_introns
chrX	108934400	108935399	1000	*	49963sicer	7.39184e-07	chrX	108928674	108939372	10699	-	intron:623182	uc004eoi.2	2182	ACSL4	hg19_genes_introns
chrX	108934400	108935399	1000	*	49963sicer	7.39184e-07	chrX	108926602	108939372	12771	-	intron:623197	uc004eoj.2	2182	ACSL4	hg19_genes_introns
chrX	108934400	108935399	1000	*	49963sicer	7.39184e-07	chrX	108926605	108939372	12768	-	intron:623212	uc004eok.2	2182	ACSL4	hg19_genes_introns
chrX	108934400	108935399	1000	*	49963sicer	7.39184e-07	chrX	108926896	108939372	12477	-	intron:623224	uc010npp.1	2182	ACSL4	hg19_genes_introns
CTRL
seqnames	start	end	width	strand	ID	qvalue	annot.seqnames	annot.start	annot.end	annot.width	annot.strand	annot.id	annot.tx_id	annot.gene_id	annot.symbol	annot.type
chr5	81396000	81397399	1400	*	15012sicer	5.2e-18	chr5	81354422	81443008	88587	+	intron:180564	uc003khq.2	83734	ATG10	hg19_genes_introns
chr5	81396000	81397399	1400	*	15012sicer	5.2e-18	chr5	81354422	81460217	105796	+	intron:180567	uc003khr.3	83734	ATG10	hg19_genes_introns
chr5	81396000	81397399	1400	*	15012sicer	5.2e-18	chr5	81354422	81460217	105796	+	intron:180575	uc003khs.3	83734	ATG10	hg19_genes_introns
chr5	81396000	81397399	1400	*	15012sicer	5.2e-18	chr5	81283498	81460217	176720	+	intron:180581	uc010jas.3	83734	ATG10	hg19_genes_introns
chr5	138837800	138839199	1400	*	15686sicer	3.42e-17	chr5	138837769	138842194	4426	-	intron:197003	uc011cze.1	641700	ECSCR	hg19_genes_introns
chr8	1899400	1899799	400	*	21982sicer	0.00941597	chr8	1893822	1900870	7049	+	intron:261969	uc003wpr.3	9639	ARHGEF10	hg19_genes_introns
chr8	1899400	1899799	400	*	21982sicer	0.00941597	chr8	1893822	1900870	7049	+	intron:261996	uc003wps.3	9639	ARHGEF10	hg19_genes_introns
chr8	1899400	1899799	400	*	21982sicer	0.00941597	chr8	1893822	1900870	7049	+	intron:262047	uc010lre.3	9639	ARHGEF10	hg19_genes_introns
chr8	67584800	67584999	200	*	22891sicer	3.05e-146	chr8	67579937	67589876	9940	+	intron:267338	uc003xwo.2	56260	C8orf44	hg19_genes_introns
chr8	67584800	67584999	200	*	22891sicer	3.05e-146	chr8	67579937	67591955	12019	+	intron:267340	uc003xwp.3	100533105	C8orf44-SGK3	hg19_genes_introns
chr11	85460200	85461199	1000	*	29991sicer	1.77801e-07	chr11	85459467	85468667	9201	-	intron:365971	uc010rtg.2	54843	SYTL2	hg19_genes_introns
chr11	85460200	85461199	1000	*	29991sicer	1.77801e-07	chr11	85459467	85468667	9201	-	intron:365988	uc010rth.2	54843	SYTL2	hg19_genes_introns
chr11	85460200	85461199	1000	*	29991sicer	1.77801e-07	chr11	85459467	85468667	9201	-	intron:366005	uc010rti.2	54843	SYTL2	hg19_genes_introns
chr11	85460200	85461199	1000	*	29991sicer	1.77801e-07	chr11	85459467	85521996	62530	-	intron:366024	uc010rtj.2	54843	SYTL2	hg19_genes_introns
chr11	85460200	85461199	1000	*	29991sicer	1.77801e-07	chr11	85459467	85468667	9201	-	intron:366029	uc001pbf.4	54843	SYTL2	hg19_genes_introns
chr14	33923000	33923799	800	*	34681sicer	1.33257e-10	chr14	33836475	34029326	192852	+	intron:418350	uc001wrs.3	64067	NPAS3	hg19_genes_introns
chr14	33923000	33923799	800	*	34681sicer	1.33257e-10	chr14	33836475	34029326	192852	+	intron:418360	uc001wrt.3	64067	NPAS3	hg19_genes_introns
chr14	33923000	33923799	800	*	34681sicer	1.33257e-10	chr14	33836475	34029326	192852	+	intron:418371	uc001wru.3	64067	NPAS3	hg19_genes_introns
chr14	33923000	33923799	800	*	34681sicer	1.33257e-10	chr14	33836475	34029326	192852	+	intron:418381	uc001wrv.3	64067	NPAS3	hg19_genes_introns
chr14	33923000	33923799	800	*	34681sicer	1.33257e-10	chr14	33836475	34029326	192852	+	intron:418390	uc001wrw.3	64067	NPAS3	hg19_genes_introns

## Sheet: H3K4me1_Promoters
HIV
seqnames	start	end	width	strand	ID	qvalue	annot.seqnames	annot.start	annot.end	annot.width	annot.strand	annot.id	annot.tx_id	annot.gene_id	annot.symbol	annot.type
chr1	117087400	117088199	800	*	2554sicer	3.36129e-08	chr1	117087227	117088226	1000	-	promoter:6001	uc001ego.1	965	CD58	hg19_genes_promoters
chr12	12491600	12492199	600	*	32258sicer	7.75691e-17	chr12	12491609	12492608	1000	-	promoter:47778	uc010shm.1	54682	MANSC1	hg19_genes_promoters
chr15	89178600	89179399	800	*	38546sicer	6.16842e-116	chr15	89177904	89178903	1000	+	promoter:54940	uc002bmu.1	3669	ISG20	hg19_genes_promoters
chr18	56206000	56206199	200	*	43801sicer	3.35758e-64	chr18	56205457	56206456	1000	-	promoter:65664	uc002lhk.1	115701	ALPK2	hg19_genes_promoters
CTL
None

## Sheet: H3K4me1_ Exons
HIV
seqnames	start	end	width	strand	ID	qvalue	annot.seqnames	annot.start	annot.end	annot.width	annot.strand	annot.id	annot.tx_id	annot.gene_id	annot.symbol	annot.type
chr1	31204800	31205599	800	*	899sicer	0	chr1	31205315	31206764	1450	-	exon:44828	uc001bsc.2	7805	LAPTM5	hg19_genes_exons
chr1	156280800	156281999	1200	*	3042sicer	1.23338e-26	chr1	156281832	156282012	181	-	exon:62710	uc001fol.2	7203	CCT3	hg19_genes_exons
chr1	156280800	156281999	1200	*	3042sicer	1.23338e-26	chr1	156280741	156280986	246	-	exon:62711	uc001fol.2	7203	CCT3	hg19_genes_exons
chr1	156280800	156281999	1200	*	3042sicer	1.23338e-26	chr1	156281832	156282012	181	-	exon:62722	uc001fon.2	7203	CCT3	hg19_genes_exons
chr1	156280800	156281999	1200	*	3042sicer	1.23338e-26	chr1	156280741	156280986	246	-	exon:62723	uc001fon.2	7203	CCT3	hg19_genes_exons
chr1	156280800	156281999	1200	*	3042sicer	1.23338e-26	chr1	156281832	156282012	181	-	exon:62737	uc010phj.2	7203	CCT3	hg19_genes_exons
chr1	156280800	156281999	1200	*	3042sicer	1.23338e-26	chr1	156280741	156280986	246	-	exon:62738	uc010phj.2	7203	CCT3	hg19_genes_exons
chr1	156280800	156281999	1200	*	3042sicer	1.23338e-26	chr1	156281832	156282012	181	-	exon:62752	uc010phk.2	7203	CCT3	hg19_genes_exons
chr1	156280800	156281999	1200	*	3042sicer	1.23338e-26	chr1	156280741	156280986	246	-	exon:62753	uc010phk.2	7203	CCT3	hg19_genes_exons
chr1	156280800	156281999	1200	*	3042sicer	1.23338e-26	chr1	156281832	156282012	181	-	exon:62765	uc010phl.2	7203	CCT3	hg19_genes_exons
chr1	156280800	156281999	1200	*	3042sicer	1.23338e-26	chr1	156280741	156280986	246	-	exon:62766	uc010phl.2	7203	CCT3	hg19_genes_exons
chr5	52218000	52218799	800	*	14981sicer	3.47066e-20	chr5	52218607	52218717	111	+	exon:197472	uc003jou.3	3672	ITGA1	hg19_genes_exons
chr5	52218000	52218799	800	*	14981sicer	3.47066e-20	chr5	52218607	52218717	111	+	exon:197501	uc003jov.3	3672	ITGA1	hg19_genes_exons
chr5	52218000	52218799	800	*	14981sicer	3.47066e-20	chr5	52218607	52218717	111	+	exon:197519	uc003jow.3	3672	ITGA1	hg19_genes_exons
chr6	25618200	25619799	1600	*	17832sicer	3.01055e-06	chr6	25619675	25620758	1084	+	exon:226768	uc010jpy.3	55604	CARMIL1	hg19_genes_exons
chr6	25618200	25619799	1600	*	17832sicer	3.01055e-06	chr6	25619675	25620758	1084	+	exon:226805	uc011djw.2	55604	CARMIL1	hg19_genes_exons
chr7	45111000	45112999	2000	*	21103sicer	1.64288e-105	chr7	45112325	45112382	58	+	exon:264362	uc003tmn.3	83605	CCM2	hg19_genes_exons
chr7	45111000	45112999	2000	*	21103sicer	1.64288e-105	chr7	45112325	45112382	58	+	exon:264372	uc003tmo.3	83605	CCM2	hg19_genes_exons
chr7	45111000	45112999	2000	*	21103sicer	1.64288e-105	chr7	45112325	45112382	58	+	exon:264381	uc003tmp.3	83605	CCM2	hg19_genes_exons
chr7	45111000	45112999	2000	*	21103sicer	1.64288e-105	chr7	45112325	45112382	58	+	exon:264389	uc003tmr.3	83605	CCM2	hg19_genes_exons
chr7	45111000	45112999	2000	*	21103sicer	1.64288e-105	chr7	45112325	45112887	563	+	exon:264403	uc011kcc.2	83605	CCM2	hg19_genes_exons
chr7	45111000	45112999	2000	*	21103sicer	1.64288e-105	chr7	45112325	45112382	58	+	exon:264410	uc003tms.3	83605	CCM2	hg19_genes_exons
chr10	114723400	114724399	1000	*	29023sicer	6.74934e-64	chr10	114724315	114724383	69	+	exon:357840	uc001lae.4	6934	TCF7L2	hg19_genes_exons
chr10	114723400	114724399	1000	*	29023sicer	6.74934e-64	chr10	114724315	114724383	69	+	exon:357921	uc010qrm.2	6934	TCF7L2	hg19_genes_exons
chr10	114723400	114724399	1000	*	29023sicer	6.74934e-64	chr10	114724315	114724383	69	+	exon:358015	uc021pyi.1	6934	TCF7L2	hg19_genes_exons
chr10	114723400	114724399	1000	*	29023sicer	6.74934e-64	chr10	114724315	114724383	69	+	exon:358030	uc021pyj.1	6934	TCF7L2	hg19_genes_exons
chr10	114723400	114724399	1000	*	29023sicer	6.74934e-64	chr10	114724315	114724383	69	+	exon:358081	uc021pyn.1	6934	TCF7L2	hg19_genes_exons
chr10	114723400	114724399	1000	*	29023sicer	6.74934e-64	chr10	114724315	114724383	69	+	exon:358095	uc021pyo.1	6934	TCF7L2	hg19_genes_exons
chr10	114723400	114724399	1000	*	29023sicer	6.74934e-64	chr10	114724315	114724383	69	+	exon:358108	uc021pyp.1	6934	TCF7L2	hg19_genes_exons
chr12	12491600	12492199	600	*	32258sicer	7.75691e-17	chr12	12491354	12491608	255	-	exon:438104	uc010shm.1	54682	MANSC1	hg19_genes_exons
chr14	64925600	64926599	1000	*	36281sicer	4.97626e-24	chr14	64926477	64926725	249	+	exon:473027	uc001xhb.3	4522	MTHFD1	hg19_genes_exons
chr14	64925600	64926599	1000	*	36281sicer	4.97626e-24	chr14	64926477	64926725	249	+	exon:473054	uc010aqf.3	4522	MTHFD1	hg19_genes_exons
chr14	69378600	69379199	600	*	36395sicer	9.87677e-22	chr14	69378873	69378959	87	-	exon:485373	uc010ttb.2	87	ACTN1	hg19_genes_exons
chr14	69378600	69379199	600	*	36395sicer	9.87677e-22	chr14	69378873	69378959	87	-	exon:485394	uc001xkl.3	87	ACTN1	hg19_genes_exons
chr14	69378600	69379199	600	*	36395sicer	9.87677e-22	chr14	69378873	69378959	87	-	exon:485415	uc001xkm.3	87	ACTN1	hg19_genes_exons
chr14	69378600	69379199	600	*	36395sicer	9.87677e-22	chr14	69378873	69378959	87	-	exon:485437	uc001xkn.3	87	ACTN1	hg19_genes_exons
chr14	69378600	69379199	600	*	36395sicer	9.87677e-22	chr14	69378873	69378959	87	-	exon:485466	uc001xko.1	87	ACTN1	hg19_genes_exons
chr14	69378600	69379199	600	*	36395sicer	9.87677e-22	chr14	69378873	69378959	87	-	exon:485480	uc010ttd.1	87	ACTN1	hg19_genes_exons
chr15	75113600	75114199	600	*	38265sicer	1.67565e-14	chr15	75114170	75114241	72	+	exon:503098	uc002ayt.1	79748	LMAN1L	hg19_genes_exons
chr15	75113600	75114199	600	*	38265sicer	1.67565e-14	chr15	75114170	75114241	72	+	exon:503111	uc010bke.1	79748	LMAN1L	hg19_genes_exons
chr15	89178600	89179399	800	*	38546sicer	6.16842e-116	chr15	89178904	89178931	28	+	exon:505387	uc002bmu.1	3669	ISG20	hg19_genes_exons
chr16	442600	443399	800	*	38872sicer	7.26404e-13	chr16	441767	442960	1194	+	exon:520920	uc002cgw.1	100134368	LOC100134368	hg19_genes_exons
chr16	57504200	57504999	800	*	39905sicer	3.0138e-08	chr16	57504192	57504266	75	+	exon:531529	uc002elt.1	5432	POLR2C	hg19_genes_exons
chr16	57504200	57504999	800	*	39905sicer	3.0138e-08	chr16	57504887	57505921	1035	+	exon:531530	uc002elt.1	5432	POLR2C	hg19_genes_exons
chr18	9180800	9183599	2800	*	43231sicer	1.37534e-12	chr18	9182380	9182517	138	+	exon:591225	uc010wzn.2	23253	ANKRD12	hg19_genes_exons
chr18	9180800	9183599	2800	*	43231sicer	1.37534e-12	chr18	9182380	9182517	138	+	exon:591234	uc002knv.3	23253	ANKRD12	hg19_genes_exons
chr18	9180800	9183599	2800	*	43231sicer	1.37534e-12	chr18	9182380	9182517	138	+	exon:591247	uc002knw.3	23253	ANKRD12	hg19_genes_exons
chr18	9180800	9183599	2800	*	43231sicer	1.37534e-12	chr18	9182380	9182517	138	+	exon:591259	uc002knx.3	23253	ANKRD12	hg19_genes_exons
chr19	3544800	3545399	600	*	44231sicer	0	chr19	3544807	3544937	131	-	exon:621395	uc002lxw.3	126321	MFSD12	hg19_genes_exons
chr19	3544800	3545399	600	*	44231sicer	0	chr19	3544807	3544937	131	-	exon:621406	uc002lxx.3	126321	MFSD12	hg19_genes_exons
chr19	3544800	3545399	600	*	44231sicer	0	chr19	3544807	3544937	131	-	exon:621417	uc002lxy.3	126321	MFSD12	hg19_genes_exons
chr19	3544800	3545399	600	*	44231sicer	0	chr19	3544807	3544937	131	-	exon:621427	uc002lxz.3	126321	MFSD12	hg19_genes_exons
CTL
None

## Sheet: H3K4me1_Intergenic
HIV
seqnames	start	end	width	strand	ID	qvalue	annot.seqnames	annot.start	annot.end	annot.width	annot.strand	annot.id	annot.tx_id	annot.gene_id	annot.symbol	annot.type
chr1	31204800	31205599	800	*	899sicer	0	chr1	31201433	31205314	3882	*	intergenic:317	NA	NA	NA	hg19_genes_intergenic
chr1	118296400	118296799	400	*	2584sicer	7.26404e-13	chr1	118171012	118406106	235095	*	intergenic:837	NA	NA	NA	hg19_genes_intergenic
chr2	65107800	65108999	1200	*	6231sicer	1.37602e-08	chr2	65095761	65128973	33213	*	intergenic:1924	NA	NA	NA	hg19_genes_intergenic
chr2	113642200	113642799	600	*	7089sicer	8.95427e-12	chr2	113599357	113665547	66191	*	intergenic:2197	NA	NA	NA	hg19_genes_intergenic
chr2	196504200	196504599	400	*	8183sicer	7.09623e-48	chr2	195284356	196516531	1232176	*	intergenic:2505	NA	NA	NA	hg19_genes_intergenic
chr2	196965800	196966399	600	*	8190sicer	4.39942e-06	chr2	196938537	196998306	59770	*	intergenic:2506	NA	NA	NA	hg19_genes_intergenic
chr2	203458600	203459999	1400	*	8314sicer	1.40543e-10	chr2	203432475	203494900	62426	*	intergenic:2543	NA	NA	NA	hg19_genes_intergenic
chr3	29030600	29031799	1200	*	9510sicer	8.55688e-10	chr3	28799829	29317802	517974	*	intergenic:2875	NA	NA	NA	hg19_genes_intergenic
chr3	45211000	45212199	1200	*	9852sicer	5.87307e-10	chr3	45192915	45265955	73041	*	intergenic:2955	NA	NA	NA	hg19_genes_intergenic
chr3	122909400	122909999	600	*	10925sicer	3.9347e-07	chr3	122880954	122915773	34820	*	intergenic:3260	NA	NA	NA	hg19_genes_intergenic
chr5	10269800	10270999	1200	*	14599sicer	1.15341e-115	chr5	10266502	10277706	11205	*	intergenic:4429	NA	NA	NA	hg19_genes_intergenic
chr5	10272200	10272999	800	*	14599sicer	1.15341e-115	chr5	10266502	10277706	11205	*	intergenic:4429	NA	NA	NA	hg19_genes_intergenic
chr5	67344200	67344799	600	*	15255sicer	2.93302e-26	chr5	67096887	67506583	409697	*	intergenic:4593	NA	NA	NA	hg19_genes_intergenic
chr6	44160000	44160799	800	*	18514sicer	1.82393e-11	chr6	44152140	44182241	30102	*	intergenic:5559	NA	NA	NA	hg19_genes_intergenic
chr6	111604600	111605399	800	*	19189sicer	1.35072e-13	chr6	111590262	111620233	29972	*	intergenic:5799	NA	NA	NA	hg19_genes_intergenic
chr6	140057200	140057999	800	*	19686sicer	3.43979e-07	chr6	139800734	140087209	286476	*	intergenic:5923	NA	NA	NA	hg19_genes_intergenic
chr8	19931600	19932999	1400	*	22970sicer	2.17735e-34	chr8	19824771	20002365	177595	*	intergenic:6987	NA	NA	NA	hg19_genes_intergenic
chr9	116419400	116420199	800	*	26270sicer	3.9133e-12	chr9	116360024	116554623	194600	*	intergenic:8002	NA	NA	NA	hg19_genes_intergenic
chr10	3834600	3835199	600	*	27031sicer	5.63638e-13	chr10	3832474	4088917	256444	*	intergenic:8223	NA	NA	NA	hg19_genes_intergenic
chr11	61438600	61439399	800	*	30374sicer	1.94879e-24	chr11	61406922	61442904	35983	*	intergenic:9316	NA	NA	NA	hg19_genes_intergenic
chr11	61743000	61744199	1200	*	30390sicer	0	chr11	61740133	61886444	146312	*	intergenic:9322	NA	NA	NA	hg19_genes_intergenic
chr15	68246000	68247799	1800	*	38065sicer	3.0278e-15	chr15	68126175	68341571	215397	*	intergenic:11787	NA	NA	NA	hg19_genes_intergenic
chr16	53075800	53076399	600	*	39784sicer	8.86612e-07	chr16	52645888	53083944	438057	*	intergenic:12341	NA	NA	NA	hg19_genes_intergenic
chr16	65768000	65769399	1400	*	39956sicer	1.13845e-104	chr16	65615204	66330711	715508	*	intergenic:12396	NA	NA	NA	hg19_genes_intergenic
chr18	51759200	51760199	1000	*	43738sicer	9.78499e-17	chr18	51756159	51790848	34690	*	intergenic:13571	NA	NA	NA	hg19_genes_intergenic
chr20	4277800	4278599	800	*	46240sicer	1.27532e-32	chr20	4234660	4409710	175051	*	intergenic:14623	NA	NA	NA	hg19_genes_intergenic
chr20	36744600	36745799	1200	*	46861sicer	1.27206e-16	chr20	36732103	36756863	24761	*	intergenic:14826	NA	NA	NA	hg19_genes_intergenic
chr21	34561000	34561799	800	*	47678sicer	2.38939e-14	chr21	34547542	34597230	49689	*	intergenic:15127	NA	NA	NA	hg19_genes_intergenic
chr22	39258000	39259799	1800	*	48728sicer	3.29607e-07	chr22	39245018	39260247	15230	*	intergenic:15450	NA	NA	NA	hg19_genes_intergenic
chrX	80633200	80635599	2400	*	49909sicer	3.03463e-21	chrX	80554047	81845262	1291216	*	intergenic:15949	NA	NA	NA	hg19_genes_intergenic
chrX	122874000	122874999	1000	*	50084sicer	3.29876e-15	chrX	122871905	122988661	116757	*	intergenic:16108	NA	NA	NA	hg19_genes_intergenic
chrX	128931600	128931799	200	*	50110sicer	1.71175e-22	chrX	128929177	128937263	8087	*	intergenic:16122	NA	NA	NA	hg19_genes_intergenic
CTL
seqnames	start	end	width	strand	ID	qvalue	annot.seqnames	annot.start	annot.end	annot.width	annot.strand	annot.id	annot.tx_id	annot.gene_id	annot.symbol	annot.type
chr1	74102200	74103799	1600	*	1904sicer	2.18163e-30	chr1	73804561	74491701	687141	*	intergenic:601	NA	NA	NA	hg19_genes_intergenic
chr2	28585800	28586399	600	*	5370sicer	6.43464e-182	chr2	28561768	28607275	45508	*	intergenic:1770	NA	NA	NA	hg19_genes_intergenic
chr6	159338200	159339199	1000	*	19410sicer	2.22492e-08	chr6	159331386	159398265	66880	*	intergenic:6002	NA	NA	NA	hg19_genes_intergenic
chr12	33686000	33686199	200	*	31464sicer	6.79908e-46	chr12	33597755	34170215	572461	*	intergenic:10041	NA	NA	NA	hg19_genes_intergenic
chr12	121381400	121381599	200	*	33011sicer	1.24304e-289	chr12	121347156	121407640	60485	*	intergenic:10540	NA	NA	NA	hg19_genes_intergenic
chr13	49119000	49119599	600	*	33857sicer	1.6121e-06	chr13	49115119	49151109	35991	*	intergenic:10797	NA	NA	NA	hg19_genes_intergenic
chr19	57683800	57684399	600	*	44581sicer	1.00896e-09	chr19	57683857	57697867	14011	*	intergenic:14524	NA	NA	NA	hg19_genes_intergenic
chr22	46038200	46039799	1600	*	47508sicer	4.80636e-80	chr22	46025513	46062677	37165	*	intergenic:15518	NA	NA	NA	hg19_genes_intergenic

## Sheet: H3K4me1_ Genes
HIV
seqnames	start	end	width	strand	ID	qvalue	annot.seqnames	annot.start	annot.end	annot.width	annot.strand	annot.id	annot.tx_id	annot.gene_id	annot.symbol	annot.type
chr1	211514600	211515199	600	*	4228sicer	2.91451e-12	chr1	211514706	211518705	4000	+	1to5kb:3631	uc001hij.3	7188	TRAF5	hg19_genes_1to5kb
chr1	211516600	211517999	1400	*	4229sicer	4.69495e-08	chr1	211514706	211518705	4000	+	1to5kb:3631	uc001hij.3	7188	TRAF5	hg19_genes_1to5kb
chr2	63351400	63352399	1000	*	6172sicer	1.21612e-09	chr2	63347678	63351677	4000	-	1to5kb:11231	uc021vin.1	100169989	DBIL5P2	hg19_genes_1to5kb
chr3	127304200	127305199	1000	*	11009sicer	1.43134e-86	chr3	127300281	127304280	4000	-	1to5kb:16632	uc031sbr.1	131601	TPRA1	hg19_genes_1to5kb
chr4	146024400	146024999	600	*	14057sicer	1.1538e-46	chr4	146020694	146024693	4000	-	1to5kb:19978	uc031shp.1	10393	ANAPC10	hg19_genes_1to5kb
chr7	28337000	28337799	800	*	20751sicer	1.21612e-09	chr7	28333940	28337939	4000	+	1to5kb:28166	uc003szo.3	9586	CREB5	hg19_genes_1to5kb
chr9	124025200	124026199	1000	*	26377sicer	4.85084e-11	chr9	124025380	124029379	4000	+	1to5kb:35280	uc004ble.1	2934	GSN	hg19_genes_1to5kb
chr9	124025200	124026199	1000	*	26377sicer	4.85084e-11	chr9	124025380	124029379	4000	+	1to5kb:35281	uc010mvq.1	2934	GSN	hg19_genes_1to5kb
chr9	124025200	124026199	1000	*	26377sicer	4.85084e-11	chr9	124025380	124029379	4000	+	1to5kb:35282	uc010mvr.1	2934	GSN	hg19_genes_1to5kb
chr9	124025200	124026199	1000	*	26377sicer	4.85084e-11	chr9	124025380	124029379	4000	+	1to5kb:35283	uc010mvs.1	2934	GSN	hg19_genes_1to5kb
chr9	124025200	124026199	1000	*	26377sicer	4.85084e-11	chr9	124025380	124029379	4000	+	1to5kb:35284	uc010mvt.1	2934	GSN	hg19_genes_1to5kb
chr9	124025200	124026199	1000	*	26377sicer	4.85084e-11	chr9	124025380	124029379	4000	+	1to5kb:35285	uc010mvu.2	2934	GSN	hg19_genes_1to5kb
chr9	124025200	124026199	1000	*	26377sicer	4.85084e-11	chr9	124025380	124029379	4000	+	1to5kb:35286	uc010mvv.1	2934	GSN	hg19_genes_1to5kb
chr14	74328000	74328799	800	*	36520sicer	2.20084e-45	chr14	74325869	74329868	4000	-	1to5kb:53044	uc021rwj.1	NA	NA	hg19_genes_1to5kb
chr14	76066200	76066999	800	*	36598sicer	0	chr14	76066805	76070804	4000	+	1to5kb:51712	uc010tvd.1	55640	FLVCR2	hg19_genes_1to5kb
chr15	75113600	75114199	600	*	38265sicer	1.67565e-14	chr15	75112817	75116816	4000	+	1to5kb:54646	uc002ayu.1	594855	CPLX3	hg19_genes_1to5kb
chr15	89178600	89179399	800	*	38546sicer	6.16842e-116	chr15	89177039	89181038	4000	+	1to5kb:54941	uc002bmv.1	3669	ISG20	hg19_genes_1to5kb
chr15	89178600	89179399	800	*	38546sicer	6.16842e-116	chr15	89177277	89181276	4000	+	1to5kb:54942	uc010upn.1	3669	ISG20	hg19_genes_1to5kb
chr16	442600	443399	800	*	38872sicer	7.26404e-13	chr16	441725	445724	4000	+	1to5kb:56912	uc021szp.1	4833	NME4	hg19_genes_1to5kb
chr16	442600	443399	800	*	38872sicer	7.26404e-13	chr16	442192	446191	4000	+	1to5kb:56913	uc002cgz.3	4833	NME4	hg19_genes_1to5kb
chr16	88674400	88674999	600	*	40512sicer	1.54002e-17	chr16	88672676	88676675	4000	+	1to5kb:58567	uc010chw.3	124245	ZC3H18	hg19_genes_1to5kb
chr17	58159400	58160399	1000	*	42310sicer	7.67097e-25	chr17	58157293	58161292	4000	-	1to5kb:64001	uc002iyk.1	63897	HEATR6	hg19_genes_1to5kb
chr18	6315400	6316399	1000	*	43204sicer	3.76271e-17	chr18	6312656	6316655	4000	-	1to5kb:65207	uc002kmy.4	91133	L3MBTL4	hg19_genes_1to5kb
chr19	3544800	3545399	600	*	44231sicer	0	chr19	3541043	3545042	4000	-	1to5kb:68305	uc010dtl.1	NA	NA	hg19_genes_1to5kb
CTL
seqnames	start	end	width	strand	ID	qvalue	annot.seqnames	annot.start	annot.end	annot.width	annot.strand	annot.id	annot.tx_id	annot.gene_id	annot.symbol	annot.type
chr8	67584800	67584999	200	*	22891sicer	3.05461e-146	chr8	67583454	67587453	4000	+	1to5kb:32441	uc003xwq.2	56260	C8orf44	hg19_genes_1to5kb
chr19	57683800	57684399	600	*	44581sicer	1.00896e-09	chr19	57679857	57683856	4000	-	1to5kb:70405	uc002qoa.1	503835	DUXA	hg19_genes_1to5kb

## Sheet: H3K4me3_Introns
seqnames	start	end	width	strand	Conc	Conc_HIV	Conc_CTL	Fold	p.value	FDR	annot.seqnames	annot.start	annot.end	annot.width	annot.strand	annot.id	annot.tx_id	annot.gene_id	annot.symbol	annot.type
chr10	76803200	76804199	1000	*	5.04	4.38	5.84	-1.45	2.47e-07	0.0023	chr10	76797836	76803554	5719	-	intron:329462	uc001jwq.1	338599	DUPD1	hg19_genes_introns
chr10	76803200	76804199	1000	*	5.04	4.38	5.84	-1.45	2.47e-07	0.0023	chr10	76803776	76818072	14297	-	intron:329463	uc001jwq.1	338599	DUPD1	hg19_genes_introns
chr8	72753800	72757799	4000	*	8.85	9.05	8.32	0.73	6.31e-07	0.00391	chr8	72755940	72756463	524	+	intron:267875	uc011lff.2	100132891	MSC-AS1	hg19_genes_introns
chr8	72753800	72757799	4000	*	8.85	9.05	8.32	0.73	6.31e-07	0.00391	chr8	72756658	72875157	118500	+	intron:267876	uc011lff.2	100132891	MSC-AS1	hg19_genes_introns
chr8	72753800	72757799	4000	*	8.85	9.05	8.32	0.73	6.31e-07	0.00391	chr8	72756658	72875157	118500	+	intron:267879	uc003xyy.3	100132891	MSC-AS1	hg19_genes_introns
chr8	72753800	72757799	4000	*	8.85	9.05	8.32	0.73	6.31e-07	0.00391	chr8	72756658	72875157	118500	+	intron:267882	uc022avt.1	100132891	MSC-AS1	hg19_genes_introns
chr8	72753800	72757799	4000	*	8.85	9.05	8.32	0.73	6.31e-07	0.00391	chr8	72754983	72755879	897	-	intron:275905	uc003xyx.1	9242	MSC	hg19_genes_introns
chr8	81015000	81016399	1400	*	4.93	5.36	3.21	2.15	2.29e-06	0.0106	chr8	80976829	81083255	106427	-	intron:276277	uc010lzs.1	7163	TPD52	hg19_genes_introns
chr8	81015000	81016399	1400	*	4.93	5.36	3.21	2.15	2.29e-06	0.0106	chr8	80976829	81083659	106831	-	intron:276284	uc003ybs.1	7163	TPD52	hg19_genes_introns
chr8	81015000	81016399	1400	*	4.93	5.36	3.21	2.15	2.29e-06	0.0106	chr8	80976829	81083659	106831	-	intron:276289	uc003ybt.1	7163	TPD52	hg19_genes_introns
chr5	115297200	115299799	2600	*	5.22	5.63	3.6	2.04	3.15e-06	0.0117	chr5	115299010	115318983	19974	+	intron:182484	uc003kro.3	206338	LVRN	hg19_genes_introns
chr5	115297200	115299799	2600	*	5.22	5.63	3.6	2.04	3.15e-06	0.0117	chr5	115299010	115318983	19974	+	intron:182503	uc003krp.3	206338	LVRN	hg19_genes_introns
chr14	85995400	86000599	5200	*	7.28	7.53	6.59	0.94	7.73e-06	0.0198	chr14	85996879	86087482	90604	+	intron:424170	uc001xvr.3	23768	FLRT2	hg19_genes_introns
chr14	85995400	86000599	5200	*	7.28	7.53	6.59	0.94	7.73e-06	0.0198	chr14	85996901	86087482	90582	+	intron:424171	uc010atd.3	23768	FLRT2	hg19_genes_introns
chr1	246951200	246952999	1800	*	4.17	3.47	5	-1.52	8.54e-06	0.0198	chr1	246944930	246952918	7989	+	intron:33564	uc001ibs.1	149134	LINC01341	hg19_genes_introns
chr1	78956400	78958199	1800	*	6.34	6.67	5.32	1.35	1.22e-05	0.025	chr1	78956922	78958356	1435	+	intron:13962	uc001dim.3	5737	PTGFR	hg19_genes_introns
chr1	78956400	78958199	1800	*	6.34	6.67	5.32	1.35	1.22e-05	0.025	chr1	78956922	78958356	1435	+	intron:13965	uc001din.3	5737	PTGFR	hg19_genes_introns
chr5	59816200	59819199	3000	*	5.16	5.47	4.19	1.29	1.81e-05	0.028	chr5	59784251	59816846	32596	+	intron:177507	uc021xza.1	25859	PART1	hg19_genes_introns
chr5	59816200	59819199	3000	*	5.16	5.47	4.19	1.29	1.81e-05	0.028	chr5	59784251	59825230	40980	+	intron:177508	uc003jsg.2	25859	PART1	hg19_genes_introns
chr10	21461400	21464399	3000	*	7.96	8.5	4.27	4.23	2.17e-05	0.0301	chr10	21463037	21463410	374	+	intron:309669	uc031ptk.1	100128511	NEBL-AS1	hg19_genes_introns
chr10	21461400	21464399	3000	*	7.96	8.5	4.27	4.23	2.17e-05	0.0301	chr10	21463303	21463410	108	+	intron:309670	uc031ptl.1	100128511	NEBL-AS1	hg19_genes_introns
chr10	21461400	21464399	3000	*	7.96	8.5	4.27	4.23	2.17e-05	0.0301	chr10	21461407	21462693	1287	-	intron:323345	uc001iqk.3	10529	NEBL	hg19_genes_introns
chr10	21461400	21464399	3000	*	7.96	8.5	4.27	4.23	2.17e-05	0.0301	chr10	21461407	21462693	1287	-	intron:323351	uc021pnu.1	10529	NEBL	hg19_genes_introns
chr22	30661000	30664999	4000	*	8.42	8.16	8.83	-0.67	2.27e-05	0.0301	chr22	30661134	30662754	1621	-	intron:600952	uc003ahb.3	5008	OSM	hg19_genes_introns
chr5	146256600	146259399	2800	*	6.53	6.78	5.87	0.91	2.47e-05	0.0306	chr5	146080706	146257564	176859	-	intron:197957	uc003loe.4	5521	PPP2R2B	hg19_genes_introns
chr5	146256600	146259399	2800	*	6.53	6.78	5.87	0.91	2.47e-05	0.0306	chr5	146080706	146257564	176859	-	intron:197965	uc003log.5	5521	PPP2R2B	hg19_genes_introns
chr5	146256600	146259399	2800	*	6.53	6.78	5.87	0.91	2.47e-05	0.0306	chr5	146257759	146258153	395	-	intron:197966	uc003log.5	5521	PPP2R2B	hg19_genes_introns
chr5	146256600	146259399	2800	*	6.53	6.78	5.87	0.91	2.47e-05	0.0306	chr5	146236147	146257564	21418	-	intron:197975	uc010jgm.4	5521	PPP2R2B	hg19_genes_introns
chr5	146256600	146259399	2800	*	6.53	6.78	5.87	0.91	2.47e-05	0.0306	chr5	146080706	146257564	176859	-	intron:197983	uc003lof.5	5521	PPP2R2B	hg19_genes_introns
chr5	146256600	146259399	2800	*	6.53	6.78	5.87	0.91	2.47e-05	0.0306	chr5	146257759	146258263	505	-	intron:197984	uc003lof.5	5521	PPP2R2B	hg19_genes_introns
chr5	146256600	146259399	2800	*	6.53	6.78	5.87	0.91	2.47e-05	0.0306	chr5	146080706	146257564	176859	-	intron:197992	uc003loh.5	5521	PPP2R2B	hg19_genes_introns
chr5	146256600	146259399	2800	*	6.53	6.78	5.87	0.91	2.47e-05	0.0306	chr5	146257759	146435227	177469	-	intron:197993	uc003loh.5	5521	PPP2R2B	hg19_genes_introns
chr5	146256600	146259399	2800	*	6.53	6.78	5.87	0.91	2.47e-05	0.0306	chr5	146080706	146435227	354522	-	intron:198001	uc003loi.5	5521	PPP2R2B	hg19_genes_introns
chr5	146256600	146259399	2800	*	6.53	6.78	5.87	0.91	2.47e-05	0.0306	chr5	146080706	146414731	334026	-	intron:198009	uc003loj.5	5521	PPP2R2B	hg19_genes_introns
chr5	146256600	146259399	2800	*	6.53	6.78	5.87	0.91	2.47e-05	0.0306	chr5	146236147	146460621	224475	-	intron:198020	uc003lok.5	5521	PPP2R2B	hg19_genes_introns
chr5	146256600	146259399	2800	*	6.53	6.78	5.87	0.91	2.47e-05	0.0306	chr5	146080706	146460621	379916	-	intron:198029	uc011dbu.3	5521	PPP2R2B	hg19_genes_introns
chr5	146256600	146259399	2800	*	6.53	6.78	5.87	0.91	2.47e-05	0.0306	chr5	146080706	146257564	176859	-	intron:198038	uc011dbv.3	5521	PPP2R2B	hg19_genes_introns
chr5	146256600	146259399	2800	*	6.53	6.78	5.87	0.91	2.47e-05	0.0306	chr5	146257759	146460621	202863	-	intron:198039	uc011dbv.3	5521	PPP2R2B	hg19_genes_introns

## Sheet: H3K4me3_Promoters
seqnames	start	end	width	strand	Conc	Conc_HIV	Conc_CTL	Fold	p.value	FDR	annot.seqnames	annot.start	annot.end	annot.width	annot.strand	annot.id	annot.tx_id	annot.gene_id	annot.symbol	annot.type
chr8	72753800	72757799	4000	*	8.85	9.05	8.32	0.73	6.31e-07	0.00391	chr8	72754358	72755357	1000	+	promoter:32482	uc011lff.2	100132891	MSC-AS1	hg19_genes_promoters
chr8	72753800	72757799	4000	*	8.85	9.05	8.32	0.73	6.31e-07	0.00391	chr8	72755351	72756350	1000	+	promoter:32483	uc003xyy.3	100132891	MSC-AS1	hg19_genes_promoters
chr8	72753800	72757799	4000	*	8.85	9.05	8.32	0.73	6.31e-07	0.00391	chr8	72755351	72756350	1000	+	promoter:32484	uc022avt.1	100132891	MSC-AS1	hg19_genes_promoters
chr8	72753800	72757799	4000	*	8.85	9.05	8.32	0.73	6.31e-07	0.00391	chr8	72756732	72757731	1000	-	promoter:33596	uc003xyx.1	9242	MSC	hg19_genes_promoters
chr5	115297200	115299799	2600	*	5.22	5.63	3.6	2.04	3.15e-06	0.0117	chr5	115297151	115298150	1000	+	promoter:21100	uc003kro.3	206338	LVRN	hg19_genes_promoters
chr5	115297200	115299799	2600	*	5.22	5.63	3.6	2.04	3.15e-06	0.0117	chr5	115297151	115298150	1000	+	promoter:21101	uc003krp.3	206338	LVRN	hg19_genes_promoters
chr5	115297200	115299799	2600	*	5.22	5.63	3.6	2.04	3.15e-06	0.0117	chr5	115298981	115299980	1000	-	promoter:22788	uc003krn.1	NA	NA	hg19_genes_promoters
chr14	85995400	86000599	5200	*	7.28	7.53	6.59	0.94	7.73e-06	0.0198	chr14	85995488	85996487	1000	+	promoter:51790	uc001xvr.3	23768	FLRT2	hg19_genes_promoters
chr14	85995400	86000599	5200	*	7.28	7.53	6.59	0.94	7.73e-06	0.0198	chr14	85995572	85996571	1000	+	promoter:51791	uc010atd.3	23768	FLRT2	hg19_genes_promoters
chr14	85995400	86000599	5200	*	7.28	7.53	6.59	0.94	7.73e-06	0.0198	chr14	85996333	85997332	1000	-	promoter:53145	uc001xvq.1	NA	NA	hg19_genes_promoters
chr1	246951200	246952999	1800	*	4.17	3.47	5	-1.52	8.54e-06	0.0198	chr1	246951919	246952918	1000	+	promoter:4021	uc010pyt.1	149134	LINC01341	hg19_genes_promoters
chr1	78956400	78958199	1800	*	6.34	6.67	5.32	1.35	1.22e-05	0.025	chr1	78955728	78956727	1000	+	promoter:1643	uc001dim.3	5737	PTGFR	hg19_genes_promoters
chr1	78956400	78958199	1800	*	6.34	6.67	5.32	1.35	1.22e-05	0.025	chr1	78955728	78956727	1000	+	promoter:1644	uc001din.3	5737	PTGFR	hg19_genes_promoters
chr10	21461400	21464399	3000	*	7.96	8.5	4.27	4.23	2.17e-05	0.0301	chr10	21461919	21462918	1000	+	promoter:37767	uc031ptk.1	100128511	NEBL-AS1	hg19_genes_promoters
chr10	21461400	21464399	3000	*	7.96	8.5	4.27	4.23	2.17e-05	0.0301	chr10	21462231	21463230	1000	+	promoter:37768	uc031ptl.1	100128511	NEBL-AS1	hg19_genes_promoters
chr10	21461400	21464399	3000	*	7.96	8.5	4.27	4.23	2.17e-05	0.0301	chr10	21463117	21464116	1000	-	promoter:39438	uc001iqk.3	10529	NEBL	hg19_genes_promoters
chr10	21461400	21464399	3000	*	7.96	8.5	4.27	4.23	2.17e-05	0.0301	chr10	21463117	21464116	1000	-	promoter:39439	uc021pnu.1	10529	NEBL	hg19_genes_promoters
chr22	30661000	30664999	4000	*	8.42	8.16	8.83	-0.67	2.27e-05	0.0301	chr22	30662830	30663829	1000	-	promoter:74784	uc003ahb.3	5008	OSM	hg19_genes_promoters
chr5	146256600	146259399	2800	*	6.53	6.78	5.87	0.91	2.47e-05	0.0306	chr5	146258349	146259348	1000	-	promoter:23155	uc003loe.4	5521	PPP2R2B	hg19_genes_promoters
chr5	146256600	146259399	2800	*	6.53	6.78	5.87	0.91	2.47e-05	0.0306	chr5	146258349	146259348	1000	-	promoter:23156	uc003log.5	5521	PPP2R2B	hg19_genes_promoters
chr5	146256600	146259399	2800	*	6.53	6.78	5.87	0.91	2.47e-05	0.0306	chr5	146258349	146259348	1000	-	promoter:23157	uc010jgm.4	5521	PPP2R2B	hg19_genes_promoters
chr5	146256600	146259399	2800	*	6.53	6.78	5.87	0.91	2.47e-05	0.0306	chr5	146258491	146259490	1000	-	promoter:23158	uc003lof.5	5521	PPP2R2B	hg19_genes_promoters

## Sheet: H3K4me3_Exons
seqnames	start	end	width	strand	Conc	Conc_HIV	Conc_CTL	Fold	p.value	FDR	annot.seqnames	annot.start	annot.end	annot.width	annot.strand	annot.id	annot.tx_id	annot.gene_id	annot.symbol	annot.type
chr10	76803200	76804199	1000	*	5.04	4.38	5.84	-1.45	2.47e-07	0.0023	chr10	76803555	76803775	221	-	exon:369612	uc001jwq.1	338599	DUPD1	hg19_genes_exons
chr8	72753800	72757799	4000	*	8.85	9.05	8.32	0.73	6.31e-07	0.00391	chr8	72755358	72755939	582	+	exon:300370	uc011lff.2	100132891	MSC-AS1	hg19_genes_exons
chr8	72753800	72757799	4000	*	8.85	9.05	8.32	0.73	6.31e-07	0.00391	chr8	72756464	72756657	194	+	exon:300371	uc011lff.2	100132891	MSC-AS1	hg19_genes_exons
chr8	72753800	72757799	4000	*	8.85	9.05	8.32	0.73	6.31e-07	0.00391	chr8	72756351	72756657	307	+	exon:300375	uc003xyy.3	100132891	MSC-AS1	hg19_genes_exons
chr8	72753800	72757799	4000	*	8.85	9.05	8.32	0.73	6.31e-07	0.00391	chr8	72756351	72756657	307	+	exon:300379	uc022avt.1	100132891	MSC-AS1	hg19_genes_exons
chr8	72753800	72757799	4000	*	8.85	9.05	8.32	0.73	6.31e-07	0.00391	chr8	72755880	72756731	852	-	exon:309514	uc003xyx.1	9242	MSC	hg19_genes_exons
chr8	72753800	72757799	4000	*	8.85	9.05	8.32	0.73	6.31e-07	0.00391	chr8	72753777	72754982	1206	-	exon:309515	uc003xyx.1	9242	MSC	hg19_genes_exons
chr5	115297200	115299799	2600	*	5.22	5.63	3.6	2.04	3.15e-06	0.0117	chr5	115298151	115299009	859	+	exon:203597	uc003kro.3	206338	LVRN	hg19_genes_exons
chr5	115297200	115299799	2600	*	5.22	5.63	3.6	2.04	3.15e-06	0.0117	chr5	115298151	115299009	859	+	exon:203617	uc003krp.3	206338	LVRN	hg19_genes_exons
chr5	115297200	115299799	2600	*	5.22	5.63	3.6	2.04	3.15e-06	0.0117	chr5	115297021	115298980	1960	-	exon:217708	uc003krn.1	NA	NA	hg19_genes_exons
chr14	85995400	86000599	5200	*	7.28	7.53	6.59	0.94	7.73e-06	0.0198	chr14	85996488	85996878	391	+	exon:475980	uc001xvr.3	23768	FLRT2	hg19_genes_exons
chr14	85995400	86000599	5200	*	7.28	7.53	6.59	0.94	7.73e-06	0.0198	chr14	85996572	85996900	329	+	exon:475982	uc010atd.3	23768	FLRT2	hg19_genes_exons
chr14	85995400	86000599	5200	*	7.28	7.53	6.59	0.94	7.73e-06	0.0198	chr14	85994961	85996332	1372	-	exon:486914	uc001xvq.1	NA	NA	hg19_genes_exons
chr1	246951200	246952999	1800	*	4.17	3.47	5	-1.52	8.54e-06	0.0198	chr1	246952919	246953000	82	+	exon:37584	uc001ibs.1	149134	LINC01341	hg19_genes_exons
chr1	246951200	246952999	1800	*	4.17	3.47	5	-1.52	8.54e-06	0.0198	chr1	246952919	246953000	82	+	exon:37587	uc010pyt.1	149134	LINC01341	hg19_genes_exons
chr1	78956400	78958199	1800	*	6.34	6.67	5.32	1.35	1.22e-05	0.025	chr1	78956728	78956921	194	+	exon:15604	uc001dim.3	5737	PTGFR	hg19_genes_exons
chr1	78956400	78958199	1800	*	6.34	6.67	5.32	1.35	1.22e-05	0.025	chr1	78956728	78956921	194	+	exon:15608	uc001din.3	5737	PTGFR	hg19_genes_exons
chr5	59816200	59819199	3000	*	5.16	5.47	4.19	1.29	1.81e-05	0.028	chr5	59816847	59822245	5399	+	exon:198109	uc021xza.1	25859	PART1	hg19_genes_exons
chr10	21461400	21464399	3000	*	7.96	8.5	4.27	4.23	2.17e-05	0.0301	chr10	21462919	21463036	118	+	exon:347449	uc031ptk.1	100128511	NEBL-AS1	hg19_genes_exons
chr10	21461400	21464399	3000	*	7.96	8.5	4.27	4.23	2.17e-05	0.0301	chr10	21463411	21463852	442	+	exon:347450	uc031ptk.1	100128511	NEBL-AS1	hg19_genes_exons
chr10	21461400	21464399	3000	*	7.96	8.5	4.27	4.23	2.17e-05	0.0301	chr10	21463231	21463302	72	+	exon:347451	uc031ptl.1	100128511	NEBL-AS1	hg19_genes_exons
chr10	21461400	21464399	3000	*	7.96	8.5	4.27	4.23	2.17e-05	0.0301	chr10	21463411	21463852	442	+	exon:347452	uc031ptl.1	100128511	NEBL-AS1	hg19_genes_exons
chr10	21461400	21464399	3000	*	7.96	8.5	4.27	4.23	2.17e-05	0.0301	chr10	21462694	21463116	423	-	exon:362791	uc001iqk.3	10529	NEBL	hg19_genes_exons
chr10	21461400	21464399	3000	*	7.96	8.5	4.27	4.23	2.17e-05	0.0301	chr10	21461312	21461406	95	-	exon:362792	uc001iqk.3	10529	NEBL	hg19_genes_exons
chr10	21461400	21464399	3000	*	7.96	8.5	4.27	4.23	2.17e-05	0.0301	chr10	21462694	21463116	423	-	exon:362798	uc021pnu.1	10529	NEBL	hg19_genes_exons
chr10	21461400	21464399	3000	*	7.96	8.5	4.27	4.23	2.17e-05	0.0301	chr10	21461312	21461406	95	-	exon:362799	uc021pnu.1	10529	NEBL	hg19_genes_exons
chr22	30661000	30664999	4000	*	8.42	8.16	8.83	-0.67	2.27e-05	0.0301	chr22	30662755	30662829	75	-	exon:675930	uc003ahb.3	5008	OSM	hg19_genes_exons
chr22	30661000	30664999	4000	*	8.42	8.16	8.83	-0.67	2.27e-05	0.0301	chr22	30660991	30661133	143	-	exon:675931	uc003ahb.3	5008	OSM	hg19_genes_exons
chr5	146256600	146259399	2800	*	6.53	6.78	5.87	0.91	2.47e-05	0.0306	chr5	146257565	146258348	784	-	exon:221118	uc003loe.4	5521	PPP2R2B	hg19_genes_exons
chr5	146256600	146259399	2800	*	6.53	6.78	5.87	0.91	2.47e-05	0.0306	chr5	146258154	146258348	195	-	exon:221127	uc003log.5	5521	PPP2R2B	hg19_genes_exons
chr5	146256600	146259399	2800	*	6.53	6.78	5.87	0.91	2.47e-05	0.0306	chr5	146257565	146257758	194	-	exon:221128	uc003log.5	5521	PPP2R2B	hg19_genes_exons
chr5	146256600	146259399	2800	*	6.53	6.78	5.87	0.91	2.47e-05	0.0306	chr5	146257565	146258348	784	-	exon:221137	uc010jgm.4	5521	PPP2R2B	hg19_genes_exons
chr5	146256600	146259399	2800	*	6.53	6.78	5.87	0.91	2.47e-05	0.0306	chr5	146258264	146258490	227	-	exon:221147	uc003lof.5	5521	PPP2R2B	hg19_genes_exons
chr5	146256600	146259399	2800	*	6.53	6.78	5.87	0.91	2.47e-05	0.0306	chr5	146257565	146257758	194	-	exon:221148	uc003lof.5	5521	PPP2R2B	hg19_genes_exons
chr5	146256600	146259399	2800	*	6.53	6.78	5.87	0.91	2.47e-05	0.0306	chr5	146257565	146257758	194	-	exon:221158	uc003loh.5	5521	PPP2R2B	hg19_genes_exons
chr5	146256600	146259399	2800	*	6.53	6.78	5.87	0.91	2.47e-05	0.0306	chr5	146257565	146257758	194	-	exon:221210	uc011dbv.3	5521	PPP2R2B	hg19_genes_exons

## Sheet: H3K4me3_Intergenic
seqnames	start	end	width	strand	Conc	Conc_HIV	Conc_CTL	Fold	p.value	FDR	annot.seqnames	annot.start	annot.end	annot.width	annot.strand	annot.id	annot.tx_id	annot.gene_id	annot.symbol	annot.type
chr14	105552200	105554799	2600	*	7.43	7.73	6.5	1.24	1.83e-08	0.00034	chr14	105536755	105607317	70563	*	intergenic:11483	NA	NA	NA	hg19_genes_intergenic

## Sheet: H3K4me3_Unique genes 1 to 5kb
HIV
None
CTL
seqnames	start	end	width	strand	ID	qvalue	annot.seqnames	annot.start	annot.end	annot.width	annot.strand	annot.id	annot.tx_id	annot.gene_id	annot.symbol	annot.type
chr9	19788200	19789199	1000	*	11086sicer	1.70242e-07	chr9	19788018	19792017	4000	-	1to5kb:36001	uc003zoa.2	25769	SLC24A2	hg19_genes_1to5kb
chr9	19788200	19789199	1000	*	11086sicer	1.70242e-07	chr9	19788018	19792017	4000	-	1to5kb:36002	uc003zob.2	25769	SLC24A2	hg19_genes_1to5kb
chr9	19788200	19789199	1000	*	11086sicer	1.70242e-07	chr9	19789104	19793103	4000	-	1to5kb:36003	uc003zoc.1	NA	NA	hg19_genes_1to5kb
chr11	122427400	122427799	400	*	14253sicer	1.48989e-19	chr11	122425655	122429654	4000	+	1to5kb:43011	uc021qrq.1	NA	NA	hg19_genes_1to5kb

[truncated: 4 more sheets: H3K4me3_Unique exons, H3K4me3_Unique intergenic, H3K4me3_Unique intron, H3K4_Unique promoters]
